1 **The role of *swnR* gene on the biosynthesis pathway of the**  
2 **swainsonine in *Metarhizium anisopliae***

3 Lu Sun<sup>1#</sup>, Runjie Song<sup>1#</sup>, Jinglong Wang<sup>2#</sup>, Yiling Liu<sup>1</sup>, Yu Zhang<sup>1</sup>, Yanli Zhu<sup>1</sup>,  
4 Qingyun Guo<sup>3</sup>, Chonghui Mo<sup>4</sup>, Baohai Wang<sup>2</sup>, Baoyu Zhao<sup>1</sup>, Hao Lu<sup>1\*</sup>

5 1 College of Veterinary Medicine, Northwest A&F University, Yangling, Shaanxi,  
6 712100, China

7 2 Tibet Academy of Agricultural and Animal Husbandry Sciences/State Key  
8 Laboratory of Barley and Yak Germplasm Resources and Genetic Improvement,  
9 Lhasa, Tibet, 850002, China

10 3 Qinghai Academy of Agriculture and Forestry Sciences, Qinghai University/Key  
11 Laboratory of Agricultural Integrated Pest Management, Qinghai Province/State Key  
12 Laboratory of Plateau Ecology and Agriculture, Qinghai University, Xining, Qinghai  
13 810016, China

14 4 College of Agriculture and Animal Husbandry, Qinghai University, Xining,  
15 Qinghai, 810016, China

16 \*Corresponding author. Lu H: E-mail: [luhao@nwsuaf.edu.cn](mailto:luhao@nwsuaf.edu.cn); Tel: +86-29-87092429;  
17 Fax: +86-29-87091032

18 #These authors contributed equally to this work.

19

20 **Abstract**

21 Swainsonine (SW) is the principal toxic ingredient of locoweeds, and is produced by  
22 fungi including *Metarhizium anisopliae*, *Slafractonia leguminicola*, and *Alternaria*

23 *oxytropis*. Studies of the SW biosynthesis pathway in these fungi have demonstrated  
24 the requirement for a *swnK* gene and the presence of a variety of other SWN cluster  
25 genes, but have not determined a precise role for the *swnR* gene, which encodes a  
26 NADB Rossmann-fold reductase, nor if it is necessary for the biosynthesis of SW. In  
27 this study, we used homologous recombination (HR) to knock out the *swnR* gene of  
28 *M. anisopliae* to determine its effect on the SW biosynthesis pathway. The  
29 concentration of SW was measured in the fermentation broth of *M. anisopliae* at 1 d,  
30 3 d, 5 d and 7 d using a Q Exactive Mass Spectrometer. The gene for *swnR* was  
31 detected by RT-qPCR. To determine the role of the *swnR* gene in the SW biosynthesis  
32 pathway of *M. anisopliae*, we used PEG-mediated homologous recombination (HR)  
33 to transform a wild-type strain (WT) with a Benomyl (*ben*)-resistant fragment to  
34 knock out the *swnR* gene producing a mutant-type strain (MT). A complemented-type  
35 (CT) strain was produced by adding a complementation vector that contains the  
36 glufosinate (herbicide) resistance (*bar*) gene as a marker. The content of SW  
37 decreased, but was not eliminated in the fermentation broth of the MT strain, and  
38 returned to the original level in the CT strain. These results indicate that the *swnR*  
39 gene plays a crucial role in the SW biosynthesis pathway of *M. anisopliae*, but  
40 suggests that another gene in the fungus may share the function of *swnR*.

41 **Keywords:** Swainsonine, *swnR*, HR, *M. anisopliae*, mutant strain, complemented  
42 strain

## 43 **Introduction**

44 *Metarhizium anisopliae* is an entomopathogenic fungus that can infect a variety of

45 agricultural pest insects and produces swainsonine[1-3]. Swainsonine is an  
46 indolizidine alkaloid that inhibits alpha-mannosidases. Swainsonine is produced by a  
47 variety of fungi and is the major toxic component of locoweed plants, which are  
48 widely found in western China and North America [4-9]. Swainsonine (SW) causes  
49 locoism in grazing animals [10-12], when consumed for an extended time. SW also  
50 has anti-tumor properties and may enhance the body's immunity [13-16].

51 Recently, Cook et al. [17] sequenced the genome of two swainsonine-producing  
52 fungi *Slafractonia leguminicola* and *Alternaria oxytropis*, and compared their  
53 swainsonine producing genes to those in *M. robertsii* and other swainsonine-producing  
54 fungi. All the swainsonine-producing fungi contained a common gene cluster "*SWN*",  
55 which included *swnH<sub>1</sub>*, *swnH<sub>2</sub>*, *swnK*, *swnN*, *swnR*, *swnA*, and *swnT*. Fungi that do not  
56 produce swainsonine do not contain the SWN cluster. These genes encode catalytic  
57 enzymes involved in the SW biosynthesis. *swnN* and *swnR* both encode NADP  
58 Rossmann-fold reductases. After annotating the "*SWN*" gene cluster, Cook et al. [17]  
59 successfully constructed a *swnK* knockout vector for the entomopathogen *M.*  
60 *robertsii*, and obtained a *swnK* mutant strain by HR. The LC-MS analysis showed that  
61 SW was eliminated in the fermentation broth of the mutant strain and the content of  
62 SW returned to normal after complementation with the *swnK* gene, indicating that the  
63 *swnK* gene is essential for SW biosynthesis.

64 The precise roles for the other genes in the SWN cluster were not determined.  
65 The aims of this study were to investigate the role of the *swnR* gene in the SW  
66 biosynthesis pathway of *M. anisopliae*. To accomplish this, *swnR* of *M. anisopliae*

67 was knocked out using HR. The deletion of *swnR* led to a significant decrease in the  
68 SW content in the fermentation broth of *M. anisopliae*. The content of SW in the  
69 complemented strain was similar to that found for the wild type strain.

## 70 **Materials and methods**

### 71 **Strain and fermentation culture**

72 *Metarhizium anisopliae*, obtained from Xi'an Jin Berry Biological Technology Co.  
73 Ltd., China, was inoculated onto Sabouraud medium (SDA) [18] containing 50 µg/ml  
74 chloramphenicol and cultured at 30 °C for 10 days. Six 5 mm plugs of mycelium were  
75 transferred into 200 mL SDA liquid culture media (without agar) and fermented at  
76 28 °C, 180 rpm, for 1 d, 3 d, 5 d, or 7 d. The mycelium and the fermentation broth  
77 were filtered through three layers of Miracloth (EMD Millipore Corp, Billerica, MA,  
78 USA) to collect the mycelium. No conidia were detected from the cultures. The  
79 mycelium was dried at room temperature and stored at 4 °C for use.

### 80 **RT-qPCR analysis of genes in the SW biosynthesis pathway of *M. anisopliae***

81 Fungal RNA was extracted using the E.Z.N.A. Fungal RNA Kit (Omega). RNA was  
82 reverse transcribed into DNA by using PrimeScript<sup>TM</sup>RT reagent Kit (Takara).  
83 Primers for amplification of *SwnN*, *SwnT*, *SwnK*, *SwnH1*, *SwnH2*, *SwnR*, and  
84 18SrRNA are shown in Table S1. All of the genes were amplified using RT-qPCR  
85 with the following conditions: 1 cycle of 95 °C for 10 min; 40 cycles of denaturation  
86 at 95 °C for 10 s, annealing at 55 °C for 90 s, and an extension at 72 °C for 32 s.  
87 Cultures were tested using RT-qPCR at 1d, 3d, 5d, and 7d.

88 **Identification of *swnR* gene of *M. anisopliae***

89 Fungal DNA was extracted using the CTAB method. Primers for amplification of  
90 *swnR* (Table S2) were designed from the *swnR* sequence from Cook et al. [17],  
91 GeneBankKID61009 of *M. anisopliae* ARSEF 549. The *swnR* gene was amplified  
92 from *M. anisopliae* DNA using L1/R1 primers (Text S1).

93 **Vector construction**

94 The upstream and downstream fragments of the *swnR* gene (Fig.S1) and the benomyl  
95 (fungicide) resistance gene (*ben*) (Fig.S2) were inserted into pUC19 (Takara) digested  
96 with *EcoR* I/*BamH* I (Takara) (Fig.S3) using the In-Fusion® HD Cloning System  
97 (Takara) to construct a knockout construct targeting the *swnR* gene (Fig.S4, Fig. S5  
98 andText S1).

99 The primers L3 and R3 (Table S1) were used to amplify the *ben* resistance gene  
100 from pBARGPE1-BenA (Wuhan Jingxiu Scientific Biotechnology Co., Ltd., China)  
101 as a template. The primers L2/R2 and L4/R4 (Table S1) were used to amplify the  
102 upstream target fragment (*swnR*-I) and the downstream target fragment (*swnR*-II),  
103 respectively, of the *swnR* gene from the genomic DNA of *M. anisopliae*. The *swnR*-I,  
104 *ben*, *swnR*-II and the double-cut pUC19 vector were ligated using In-Fusion cloning.  
105 The *swnR* gene fragment was amplified using primers L1/R1 (Table S1) from the  
106 genomic DNA of *M. anisopliae*. To produce a complementation vector, the *swnR* was  
107 inserted between *trpC* promoter and *trpC* terminator of pBARGPE1 vector, which  
108 contains the glufosinate (herbicide) resistance (*bar*) gene as a marker, using In-Fusion

109 cloning (Fig.1).

## 110 **Preparation of protoplasts**

111 Six 5 mm plugs from 10-day cultures of *M. anisopliae* grown on SDA media were  
112 transferred into each 200 mL flask of SDA liquid culture media (without agar), and  
113 incubated at 28 °C, 180 rpm for 1 d, 2 d, 3 d, 4 d and 5 d. The resulting mycelia were  
114 filtered through sterile miracloth. To the collected hyphae were added different  
115 concentrations of enzymatic hydrolysate (Sigma Aldrich) prepared with 1.2 M KCl,  
116 and hydrolyzed at 30 °C, 100 rpm, for 1 h, 3 h, 5 h, 7 h, and 10 h. The optimal  
117 combination of enzymes and conditions were determined based on protoplast yield.  
118 Yield from different enzymes, including 1% snail enzyme, 1% cellulase, and 1%  
119 lysing enzymes, and combinations of the enzymes were also tested. The  
120 enzymatically digested mixtures were filtered through a layer of sterile miracloth and  
121 two layers of filter paper into a sterile 50 mL centrifuge tube, and the protoplasts were  
122 washed extensively with 1.2 M KCl and centrifuged at 4000 rpm for 6 min at room  
123 temperature. After discarding the supernatant, 10 mL of STC Buffer (0.6 M Sorbitol;  
124 10 mM Tris-HCl; 10 mM CaCl<sub>2</sub>, pH 6.5) was added and the protoplasts were gently  
125 resuspended. The mixture was centrifuged at 4000 rpm for 6 minutes. After  
126 discarding the supernatant, 1 mL of STC Buffer was added. The protoplasts were then  
127 centrifuged at room temperature at 3500 rpm for 6 min, which was repeated. Finally,  
128 protoplasts were adjusted to 2-5×10<sup>7</sup>/mL for subsequent experiments.

## 129 **PEG mediated DNA transformation**

130 Transformation of the protoplasts were done as in Proctor et al., 1995[19].  
131 Approximately 5-10 µg of the linearized *swnR* knockout vector was added to a 50 mL  
132 centrifuge tube containing  $2-5 \times 10^7$ /mL protoplasts, and allowed to stand at room  
133 temperature for 20 min without shaking. Then 1-1.25 mL of 40% PTC (40% PEG  
134 8000, 20% sucrose, 50 mM CaCl<sub>2</sub>, 10 mM Tris-HCl) was added to the tube (mixed  
135 thoroughly by inversion), and let stand at room temperature for 20 min without  
136 shaking. Thereafter, 5 mL of TB<sub>3</sub> (0.3% Yeast Extract, 0.3% acid hydrolyzed casein,  
137 20% sucrose) containing 50 g/mL ampicillin (Sigma Aldrich) was added and shaken  
138 at room temperature overnight. The overnight protoplasts were centrifuged at 4000  
139 rpm for 6 min, the supernatant was discarded, and about 1 mL of the remaining liquid  
140 was used to suspend the remainder. The regenerated protoplasts were added to 10 mL  
141 of Bottom Agar (0.3% Yeast Extract, 0.3% acid hydrolyzed casein, 20% sucrose, 1%  
142 Agar) containing 100 µg/mL benomyl (Fig.S4). After incubation at 30 °C for 10  
143 hours, Top Agar (0.3% Yeast Extract, 0.3% acid hydrolyzed casein, 20% sucrose,  
144 1.5% Agar) containing 200 µg/mL benomyl was added. After 3-5 d, a single colony  
145 transformant grew on the plate, which was transferred to SDA medium containing  
146 200 µg/mL benomyl. The wild type *M. anisopliae* was used as a control. The *swnR*  
147 gene mutant strain of *M. anisopliae* was named MT. The transformation of the  
148 complement vector was the same as described above, and 2 mg/mL of glufosinate  
149 (Fig.S6) was used for screening of the complement (CT).

#### 150 **PCR identification of MT and CT**

151 The *M. anisopliae* strain carrying the benomyl resistance gene was used as a template,  
152 and PCR amplification was carried out using primer L1/R1. Subsequently, the  
153 complemented strain was subjected to the same PCR amplification using primers  
154 L1/R1 (Table S1).

#### 155 **Phenotypic observation and growth rate determination MT, CT and WT**

156 Colonies of MT and WT of the same size were inoculated into the same position on  
157 the SDA medium and grown at 28 °C for 3 d, 5 d and 10 d, after which they were  
158 measured for diameter and photographed.

#### 159 **SW content detection of fermentation broth of WT, MT, CT in *M. anisopliae***

160 The WT, MT, CT strains were inoculated into SDA medium containing 50 µg/ml  
161 chloramphenicol and cultured at 28 °C for 10 days. Then six 5 mm plugs of each  
162 strain were transferred into 200 mL flasks of SDA (without agar) culture medium and  
163 grown at 28 °C, 180 rpm, for 3 d. The flasks of fermentation broth of WT, MT, and  
164 CT were combined by strain and filtered to obtain 500 mL of fermentation broth. The  
165 SW (control from Sigma Aldrich) in each extract was analyzed using Q Exactive  
166 Mass Spectrometer (Thermo Fisher) using the methods of Song et al. [20]. SW  
167 concentration was tested three times for each strain.

#### 168 **Statistical analysis**

169 In this study, each measurement was tested three times. Statistical analysis was  
170 performed on the measured data using SPSS 20.0 software. The results were  
171 expressed as mean ± SEM. One-way ANOVA was performed on each sample,



172 \*P<0.05, indicating a significant difference between the two groups, \*\*P<0.01,  
173 indicating that the difference between the two groups is highly significant. Results  
174 from the cultures were used for determining the optimal time periods for swainsonine  
175 production. The mass concentration peak area for SW was compared using linear  
176 regression. The colony diameters were measured by ruler. RT-qPCT data were  
177 analyzed using the  $2^{-\Delta\Delta CT}$  method.

## 178 **Results**

### 179 **Detection of SW in fermentation broth of *M. anisopliae* in different periods**

180 To detect the SW content in the fermentation broth at different time points, the same  
181 volume of *M. anisopliae* fermentation broth was concentrated, and the level of SW  
182 was detected using a Q Exactive Mass Spectrometer. The retention times for the SW  
183 peak of the SW standard and the SW test samples was 4.4 (Fig.S7A, S7B,S7C, S7D,  
184 and S7E). The standard curve was drawn according to the calculated regression  
185 equation:  $Y=31302.5X- 45910.5$  ( $R^2= 0.997$ ) (Fig.S7F). From the linear regression  
186 equation of mass concentration-peak area of SW, the SW content in the fermentation  
187 broth of *M. anisopliae* was calculated to be  $169.67 \pm 50.78 \mu\text{g}/\text{mg}$  (S7A),  $174.01 \pm$   
188  $45.79 \mu\text{g}/\text{mg}$  (Fig.S7B),  $116.72 \pm 45.74 \mu\text{g}/\text{mg}$  (Fig.S7C), and  $104.85 \pm 40.35 \mu\text{g}/\text{mg}$   
189 (Fig. S7D), at 1, 3, 5, and 7 days of growth, respectively. Day 3 of fermentation gave  
190 the highest content of SW (Fig. 2).

### 191 **RT-qPCR analysis of key catalytic enzyme genes in the SW biosynthesis pathway** 192 **of *M. anisopliae***

193 RT-qPCR was conducted for genes in the SW biosynthesis pathway to determine their  
194 relative expression at 1d, 3d, 5d, and 7d. The expression of *swnN* was down-regulated  
195 from 1d to 3d. The expression levels of *swnT* and *swnK* decreased at 3 d and 5 d, and  
196 the expression of *swnH<sub>1</sub>* and *swnH<sub>2</sub>* did not significantly change. The expression of  
197 *swnR* gene was significantly up-regulated at 3 d and decreased at 5d and 7d (Fig.3).

### 198 **Screening for optimal conditions for protoplast preparation**

199 We explored the conditions affecting the preparation of protoplasts of *M. anisopliae* to  
200 enhance genetic manipulation of the fungus. Hyphae produced from fermentation  
201 times of 1 d, 2 d, 3 d, 4 d, and 5 d were enzymatically digested for 3 h at 30 °C, 100  
202 rpm. The optimal fermentation time of 2 d was determined based on protoplast yield  
203 (Fig.4A). The effects of different enzymatic hydrolysis combinations and enzymatic  
204 concentrations were compared on protoplast preparations of *M. anisopliae*. Enzymatic  
205 hydrolysis using 1% snail enzyme, 1% cellulase, and 1% lysing enzymes was the best  
206 and produced the largest number of protoplasts (Fig.4B). Duration of enzymatic  
207 hydrolysis time is also an important variable of the protoplast preparation process, so  
208 the optimal enzymatic hydrolysis time was assessed. When enzymatically hydrolyzed  
209 for 3 h, the hyphal wall was completely dissolved, releasing large numbers of  
210 protoplasts (Fig.4C and 4D).

### 211 **Production of MT and CT**

212 To determine the role of the *swnR* gene in the SW biosynthesis pathway of *M.*  
213 *anisopliae*, homologous recombination was used to knock out *swnR*. The resulting

214 transformant (1 out of 55) grew on SDA media containing 200 µg/mL benomyl.  
215 Subsequently, the L1/R1 primer set was used to identify the genomic DNA of the  
216 transformant (MT) using electrophoresis and sequencing (Fig.1 andText S2). To  
217 verify the status of MT, a complement was produced by transforming the wild-type  
218 *swnR* gene in pBARGPE1 into the MT. The complement transformant was grown on  
219 SDA medium containing 2 mg/mL glufosinate and was identified as above.

### 220 **Phenotypic observation and growth rate determination of WT, MT, and CT**

221 The WT, MT, and CT isolates were grown on three SDA plates each with two colonies  
222 per plate for 3 d, 5 d, and 10 d (Fig.5A) to compare growth. The colony diameters,  
223 phenotypes, and growth rates did not change significantly (Fig.5B).

### 224 **Q Exactive Mass Spectrometer detection of SW in fermentation broth of MT, CT 225 and WT**

226 The same volume of MT, CT and WT fermentation broth was concentrated, and the  
227 concentration of SW was detected using a Q Exactive Mass Spectrometer. The peak  
228 time in the test samples and the SW standard was 4.4 (Fig.S8A, S8B and S8C). From  
229 the linear regression equation of mass concentration-peak area of SW, the content of  
230 SW in the fermentation broth of *M. anisopliae* was calculated to be  $82.91 \pm 15.92$   
231 µg/mg for WT (Fig.S8A),  $56.42 \pm 10.82$  µg/mg for CT (Fig.S8C) and  $5.71 \pm 2.23$   
232 µg/mg for MT (Fig.S8B). The content of SW in the fermentation broth of the MT was  
233 significantly lower than that in the complemented strain and WT (Fig.6).

### 234 **Discussion**

235 While Cook et al. [17] demonstrated that the *swnK* gene is required for the SW  
236 biosynthesis of *M. robertsii*, no studies had determined which other genes are required  
237 for SW biosynthesis in *M. anisopliae*. We carried out a time course of SW in the  
238 fermentation broth of *M. anisopliae*, and compared the SWN gene expression for the  
239 same time course. The results showed that SW concentration was the highest at 3 d  
240 and the *swnR* gene was highly expressed at this time. This suggested that the *swnR*  
241 gene may play an important role in the SW biosynthesis pathway of *M. anisopliae*.

242 To further confirm the role of the *swnR* gene in the SW biosynthesis pathway of  
243 *M. anisopliae*, the *swnR* gene was knocked out using the benomyl resistance gene as a  
244 screening marker. The content of SW in MT was significantly reduced. Cook et al.  
245 [17] found that the *swnK* MT did not produce SW at all. However, in this study, after  
246 the *swnR* gene was knocked out, the content of SW was reduced, rather than  
247 completely absent. The cause of the low SW content may be due to the presence of a  
248 catalytic enzyme gene having the same function as the *swnR* gene. Since *swnN* is also  
249 a Rossman fold reductase, and is present in all SW-producing fungi, this could  
250 provide a similar activity and thus explain why SW was decreased rather than  
251 eliminated.

252 To demonstrate that the decrease in the content of SW was caused by the knock  
253 out of the *swnR* gene, the gene was complemented by inserting the wild-type *swnR*  
254 gene into the MT. The content of SW in the complement returned to normal levels, as  
255 predicted. Cook et al. [17] showed an increase in the content of SW after  
256 complementing the *swnK* gene, likely due to the high expression of the *swnK* gene in

257 the complemented strain. We performed phenotypic observations and growth rate  
258 measurements on the MT, and found that it did not differ significantly from the  
259 wild-type strain. Therefore, the deletion of the *swnR* gene resulted in a decrease in the  
260 content of SW, but did not affect the radial growth of *M. anisopliae*. It is not known if  
261 sporulation or some other growth component was changed with the knockout.

262 The factors affecting the preparation of protoplasts and regeneration of  
263 filamentous fungi include the age of fungi, the choice of medium and enzymatic  
264 hydrolysate, enzymatic hydrolysis conditions and length of enzymatic hydrolysis [21,  
265 22]. We found that *M. anisopliae* grown on SDA medium for 3d produced the most  
266 protoplasts. The cell wall composition of *M. anisopliae* is reported to be very complex  
267 [23], which might have favored the compound enzyme for the release of the *M.*  
268 *anisopliae* protoplasts This study showed that the protoplast release of *M. anisopliae*  
269 was the highest when digested with 1% snail enzyme, 1% cellulose, and 1% lysing  
270 enzymes for 3 h.

271 SW can cause neurotoxicity in grazing animals [24-26] and seriously threatens  
272 the production and development of animal husbandry [8, 9, 27]. SW also has  
273 significant anticancer and antitumor effects [28-30]. However, the limited source of  
274 SW, the difficulty of artificial synthesis, low extraction efficiency and high market  
275 prices have greatly limited the development of SW for anticancer and anti-tumor  
276 applications [14, 31, 32]. The production of SW by microbial fermentation,  
277 specifically by *M. anisopliae* or *S. leguminicola*[33] might be possible if the SWN  
278 pathway is better characterized.

## 279 **Conclusions**

280 In this study, we demonstrated that the deletion of the *swnR* gene resulted in a  
281 decrease in swainsonine concentration in the fermentation broth of *M. anisopliae* and  
282 the recovery of swainsonine concentration to normal levels in the complemented  
283 strain. This suggests that the *swnR* gene plays an important role in the swainsonine  
284 biosynthesis pathway of *M. anisopliae* (Fig. 7). This study provides a preliminary  
285 research basis for the in-depth study of the swainsonine biosynthesis pathway and  
286 related catalytic enzyme genes.

287 **Author Contributions**

288 **Conceptualization:** Hao Lu, Baohai Wang, Baoyu Zhao, Qingyun Guo.

289 **Data curation:** Jingling Wang, Chonghui Mo.

290 **Formal analysis:** Lu Sun, Runjie Song, Yu Zhang, Yanli Zhu, Yiling Liu.

291 **Funding acquisition:** National Natural Science Foundation (No. 31201958), Key  
292 project of Natural Science Foundation of Shaanxi province (No. 2017JZ004), Science  
293 and Technology Special Fund Aid to Qinghai (2020-QY-210).

294 **Investigation:** Lu Sun, Runjie Song, Yu Zhang, Yanli Zhu, Yiling Liu.

295 **Methodology:** Lu Sun, Runjie Song.

296 **Project administration:** Hao Lu.

297 **Resources:** Hao Lu, Baoyu Zhao.

298 **Supervision:** Jinglong Wang, Qingyun Guo, Chonghui Mo, Baohai Wang, Baoyu  
299 Zhao, Hao Lu.

300 **Validation:** Lu Sun, RunJie Song.

301 **Visualization:** Lu Sun, RunJie Song.

302 **Writing-original draft:** Lu Sun, RunJie Song.

303 **Writing-review & editing:** Lu Sun, Runjie Song, Jinglong Wang, Yiling Liu, Yu Zhang,  
304 Yanli Zhu, Qingyun Guo, Chonghui Mo, Baohai Wang, Baoyu Zhao, Hao Lu.

## 305 **References**

- 306 1. Hino M, Nakayama O, Tsurumi Y, Adachi K, Shibata T, Terano H, et al. Studies of  
307 an immunomodulator, swainsonine. I. Enhancement of immune response by  
308 swainsonine in vitro. J. Antibiot. 1985;38:926-35. doi:  
309 org/10.7164/antibiotics.38.926.
- 310 2. Tian T, Li R, Lu X, Zhang L, Dong J, Zhang Z, et al. Screening for high virulence  
311 strains of *Metarhizium anisopliae* against *Locusta migratoria manilensis* from  
312 Baoding. Plant. Prot. 2009;5:65-69. doi: 10.3969/j.issn.0529-1542.2009.05.015.
- 313 3. Roberts DW, Leger RJS. *Metarhizium* spp., cosmopolitan insect-pathogenic fungi:  
314 mycological aspects. Adv. Appl. Microbiol. 2004;54:1-70. doi:  
315 org/10.1016/S0065-2164(04)54001-7.
- 316 4. Huang Y, Zhang E, Pan W. Current status of locoweed toxicity. Shandong Sci.  
317 2001;16:34-9.
- 318 5. Li J, Lu L, Cang Y, Dai C, Qiao J, Chen K. Study on the sterols of *Hericium*  
319 *erinaceus* extracts. Chinese J. Biochem. Pharmateutics 2001;3:124-6.
- 320 6. Zhao B, Tong D, Ge P, Dong Q, Mo C. Locoweed harm investigation in the west  
321 grassland of China. Chinese J. Grassland 2003;25:65-8.
- 322 7. Chen J, Ma R, Lu H, Wang Z, Zhao B. Progress on locoweed-fungal endophyte.  
323 Prog. Vet. Med. 2011;32:77-81. doi: org/10.1093/mp/ssq070.
- 324 8. Pryor BM, Creamer R, Shoemaker RA, McClain-Romero J, Hambleton S.  
325 *Undifilum*, a new genus for endophytic *Embellisia oxytropis* and parasitic  
326 *Helminthosporium bornmuelleri* on legumes. Botany. 2009;87:178-194. doi:



- 327           org/10.1007/s00299-005-0913-4.
- 328    9. Baucom D, Romero M, Belfon R, Creamer R. Two new species of *Undifilum*, the  
329           swainsonine producing fungal endophyte, from *Astragalus* species of locoweeds  
330           in the United States. *Botany*. 2012;90:866-875. doi: org/10.1139/b2012-056.
- 331    10. Panter KE, James LF, Stegelmeier BL, Ralphs MH, Pfister JA. Locoweeds:  
332           effects on reproduction in livestock. *J. Nat. Toxins* 1999;8:53-62.
- 333    11. Wu C, Wang W, Liu X, Ma F, Cao D, Yang X, et al. Pathogenesis and preventive  
334           treatment for animal disease due to locoweeds poisoning. *Environ. Toxicol.*  
335           *Pharmacol.* 2014;37:336-47. doi: org/10.1016/j.etap.2013.11.013.
- 336    12. Zhao B, Liu Z, Lu H, Wang Z, Sun L, Wan X, et al. Damage and Control of  
337           Poisonous Weeds in Western Grassland of China. *Agri. Sci. in China*  
338           2010;9:1512-1521.
- 339    13. White SL, Nagai T, Akiyama SK, Reeves EJ, Grzegorzewski K, Olden K.  
340           Swainsonine stimulation of the proliferation and colony forming activity of  
341           murine bone marrow. *Cancer Commun* 1991;3:83-91. doi:  
342           org/10.1007/BF00841258.
- 343    14. Klein JL, Roberts JD, George MD, Kurtzberg J, Breton P, Chermann JC, et al.  
344           Swainsonine protects both murine and human haematopoietic systems from  
345           chemotherapeutic toxicity. *Br. J. Cancer* 1999;80:87-95. doi:  
346           org/10.1038/sj.bjc.6690326.
- 347    15. Rooprai HK, Kandaneeratchi A, Maidment SL, Christidou M, Trillo-Pazos G,  
348           Dexter DT, et al. Evaluation of the effects of swainsonine, captopril,

- 349 tangeretin and nobiletin on the biological behaviour of brain tumour cells in  
350 vitro. *Neuropathol. Appl. Neurobiol.* 2001;27:29-39. doi:  
351 [org/10.1046/j.0305-1846.2000.00298.x](https://doi.org/10.1046/j.0305-1846.2000.00298.x).
- 352 16. Hamaguchi J, Nakagawa H, Takahashi M, Kudo T, Kamiyama N, Sun B, et al.  
353 Swainsonine reduces 5-fluorouracil tolerance in the multistage resistance of  
354 colorectal cancer cell lines. *Mol. Cancer* 2007;6:58. doi:  
355 [org/10.1186/1476-4598-6-58](https://doi.org/10.1186/1476-4598-6-58).
- 356 17. Cook D, Donzell B, Creamer R, Baucom DL, Gardner DR, Pan J, et al.  
357 Swainsonine Biosynthesis Genes in Diverse Symbiotic and Pathogenic Fungi.  
358 *G3 (Bethesda)* 2017;7:1791-1797. doi: [org/10.1534/g3.117.041384](https://doi.org/10.1534/g3.117.041384).
- 359 18. Shi YH. Functional analysis of *Metarhizium acridum Mab1A* in conidiation  
360 regulation and pathogenicity. M. D. of Science, dissertation, Chongqing  
361 University, Chongqing, China, 2016, April.
- 362 19. Proctor, R. H., Hohn, T. M., McCormick, S. P. Reduced virulence of *Gibberella*  
363 *zeae* caused by disruption of a trichothecene toxin biosynthetic gene. *Mol.*  
364 *Plant-Microbe Interact.* 1995;8:593-601. doi: [10.1094/MPMI-8-0593](https://doi.org/10.1094/MPMI-8-0593).
- 365 20. Song R, Wang J, Sun L, Zhang Y, Ren Z, Zhao B, et al. The study of metabolites  
366 from fermentation culture of *Alternaria oxytropis*. *BMC Microbiol.* 2019;11:35.  
367 doi: [org/10.1186/s12866-019-1408-8](https://doi.org/10.1186/s12866-019-1408-8).
- 368 21. Yu J, Keller N. Regulation of secondary metabolism in filamentous fungi. *Annu.*  
369 *Rev. Phytopathol.* 2005;43:437-458. doi:  
370 [org/10.1146/annurev.phyto.43.040204.140214](https://doi.org/10.1146/annurev.phyto.43.040204.140214).

- 371 22. Abello J, Kelemu S, Garcia C. Agrobacterium-mediated transformation of the  
372 endophytic fungus *Acremonium implicatum* associated with *Brachiaria grasses*.  
373 Mycol. Res. 2008;112:407-413. doi: [org/10.1016/j.mycres.2007.10.008](https://doi.org/10.1016/j.mycres.2007.10.008).
- 374 23. Ranga V, Saini GK. Biochemical and molecular characterization of wild-type and  
375 fused protoplasts of *Beauveria bassiana* and *Metarhizium anisopliae*. Folia.  
376 Microbiol. (Praha) 2011;56:289-295. doi: [org/10.1007/s12223-011-0055-8](https://doi.org/10.1007/s12223-011-0055-8).
- 377 24. Marsh CD. The locoweed disease of the plains. United States Department of  
378 Agriculture, Washington, DC, 1909;112.
- 379 25. Gardiner MR, Linto AC, Aplin TEH. Toxicity of *Swainsona canescens* for sheep  
380 in western Australia. Australian J. Agri. Res. 1969;20:87-97. doi:  
381 [org/10.1071/AR9690087](https://doi.org/10.1071/AR9690087).
- 382 26. Lu H, Cao DD, Ma F, Wang SS, Yang XW, Wang WL, et al. Characterisation of  
383 locoweeds and their effect on livestock production in the western rangelands of  
384 China: a review. Rangeland J. 2014;36:121-131. doi: [org/10.1071/RJ13105](https://doi.org/10.1071/RJ13105).
- 385 27. Yu Y, Zhao Q, Wang J, Wang J, Wang Y, Song Y, et al. Swainsonine-producing  
386 fungal endophyte from major locoweed species in China.  
387 Toxicon.2010;56:330-338. doi: [org/10.3892/mmr.2011.622](https://doi.org/10.3892/mmr.2011.622).
- 388 28. Zou HXF, Zhang Z, Sun X. Research progress of a promising anti-cancer drug  
389 swainsonine. Chin. Tradit. Drugs 1997;28:437-439.
- 390 29. Liu B, Liu Y, Yin H, Chen X. Inhibition effect of swainsonine on the growth and  
391 metastasis of gastric cancer in vivo. Chin. J. Oncol. 1999;20:168-170.
- 392 30. Shi Y, Li M, Xu F. A review of the study on swainsonine--toxic elements of

- 393 locoweed. Zhong Yao Cai. 1999;22:47-49.
- 394 31. Liu Z, Zhao B, Sun L, Wan X, Huo X. Research advances in swainsonine  
395 resources and its detection methods. Chinese Vet. Sci. 2008;38:175-180. doi:  
396 [org/10.3969/j.issn.1673-4696.2008.02.019](https://doi.org/10.3969/j.issn.1673-4696.2008.02.019).
- 397 32. Bennett RB, Choi JR, Montgomery WD, Cha JK. A short, enantioselective  
398 synthesis of (-)-swainsonine. J. Am. Chem. Soc. 1989;111:2580-2582. doi:  
399 [org/10.1021/ja00189a034](https://doi.org/10.1021/ja00189a034).
- 400 33. Tong DW, Cao GR, Li SJ. Isolation and identification of swainsonine from  
401 *Oxytropis kansuensis* Bunge. J. Northwest A&F Univ. (Na.t Sci. Edit.)  
402 2001;29:295-298.

403 **Fig legends:**

404 Fig. 1. Verification of MT, CT and WT. PCR products using primers L1/R1 from WT  
405 (wild type), knockout (MT), and complement (CT).

406 Fig. 2. Detection of SW in fermentation broth of *M. anisopliae* in different time. Time  
407 course - SW amount graph, There are three parallel replicates for each test sample in  
408 this test. Each data in the graph is the mean  $\pm$  SEM, n = 3, P<0.05.

409 Fig. 3. RT-qPCR analysis of key catalytic enzyme genes in the SW biosynthesis  
410 pathway of *M. anisopliae*. RNA was extracted, converted to cDNA, and the  
411 expression of *swnN*, *swnT*, *swnK*, *swnH<sub>2</sub>*, *swnH<sub>1</sub>*, *swnA* and *swnR* in *M. anisopliae* at 1  
412 d, 3 d, 5 d and 7 d was tested. Error bars represent the standard error of the mean (n =  
413 3), \*P< 0.05; \*\*P<0.01.

414 Fig. 4. Screening for optimal conditions for protoplast preparation and PEG mediated  
415 *swnR* transformation. (A-D) *M. anisopliae* cultured for 10 d were inoculated to 200  
416 mL of Czapek's medium with a sterile inoculation needle, cultured at 30 °C, 180 rpm  
417 for 1 d, 2 d, 3 d, 4 d and 5 d. The mycelium of the above fermentation for 1 d, 2 d, 3  
418 d, 4 d and 5 d were filtered with sterile miracloth. The collected hyphae were added to  
419 different concentrations of enzymatic hydrolysate prepared with 1.2 M KCl as  
420 osmotic stabilizer, and hydrolyzed at 30 °C, 100 rpm, for 1 h, 3 h, 5 h, 7 h and 10 h.  
421 The protoplast release of *M. anisopliae* was the highest when digested with 1% snail  
422 enzyme, 1% cellulase and 1% lysing enzymes for 3 h. Each data in the graph is the  
423 mean  $\pm$  SEM, n = 3, P<0.05.

424 Fig. 5. Phenotypic observation and growth rate determination of MT, CT and WT.

425 (A-B) The MT, CT and WT of the same size were inoculated into the same position  
426 of the SDA medium at 28 °C for 3d, 5d and 10d, after which they were measured for  
427 diameter and photographed.

428 Fig. 6. Q Exactive Mass Spectrometer detection of SW in fermentation broth of MT,  
429 CT and WT. The content of SW in the fermentation broth of the WT was significantly  
430 lower than that in CT and wild-type strain, and there was a significant difference.  
431 Data represented as mean  $\pm$  SEM, n = 3, \*\*P < 0.01.

432 Fig. 7. Decreased swainsonine content after knockout of SwnR gene by homologous  
433 recombination .

M WT CT MT

kb

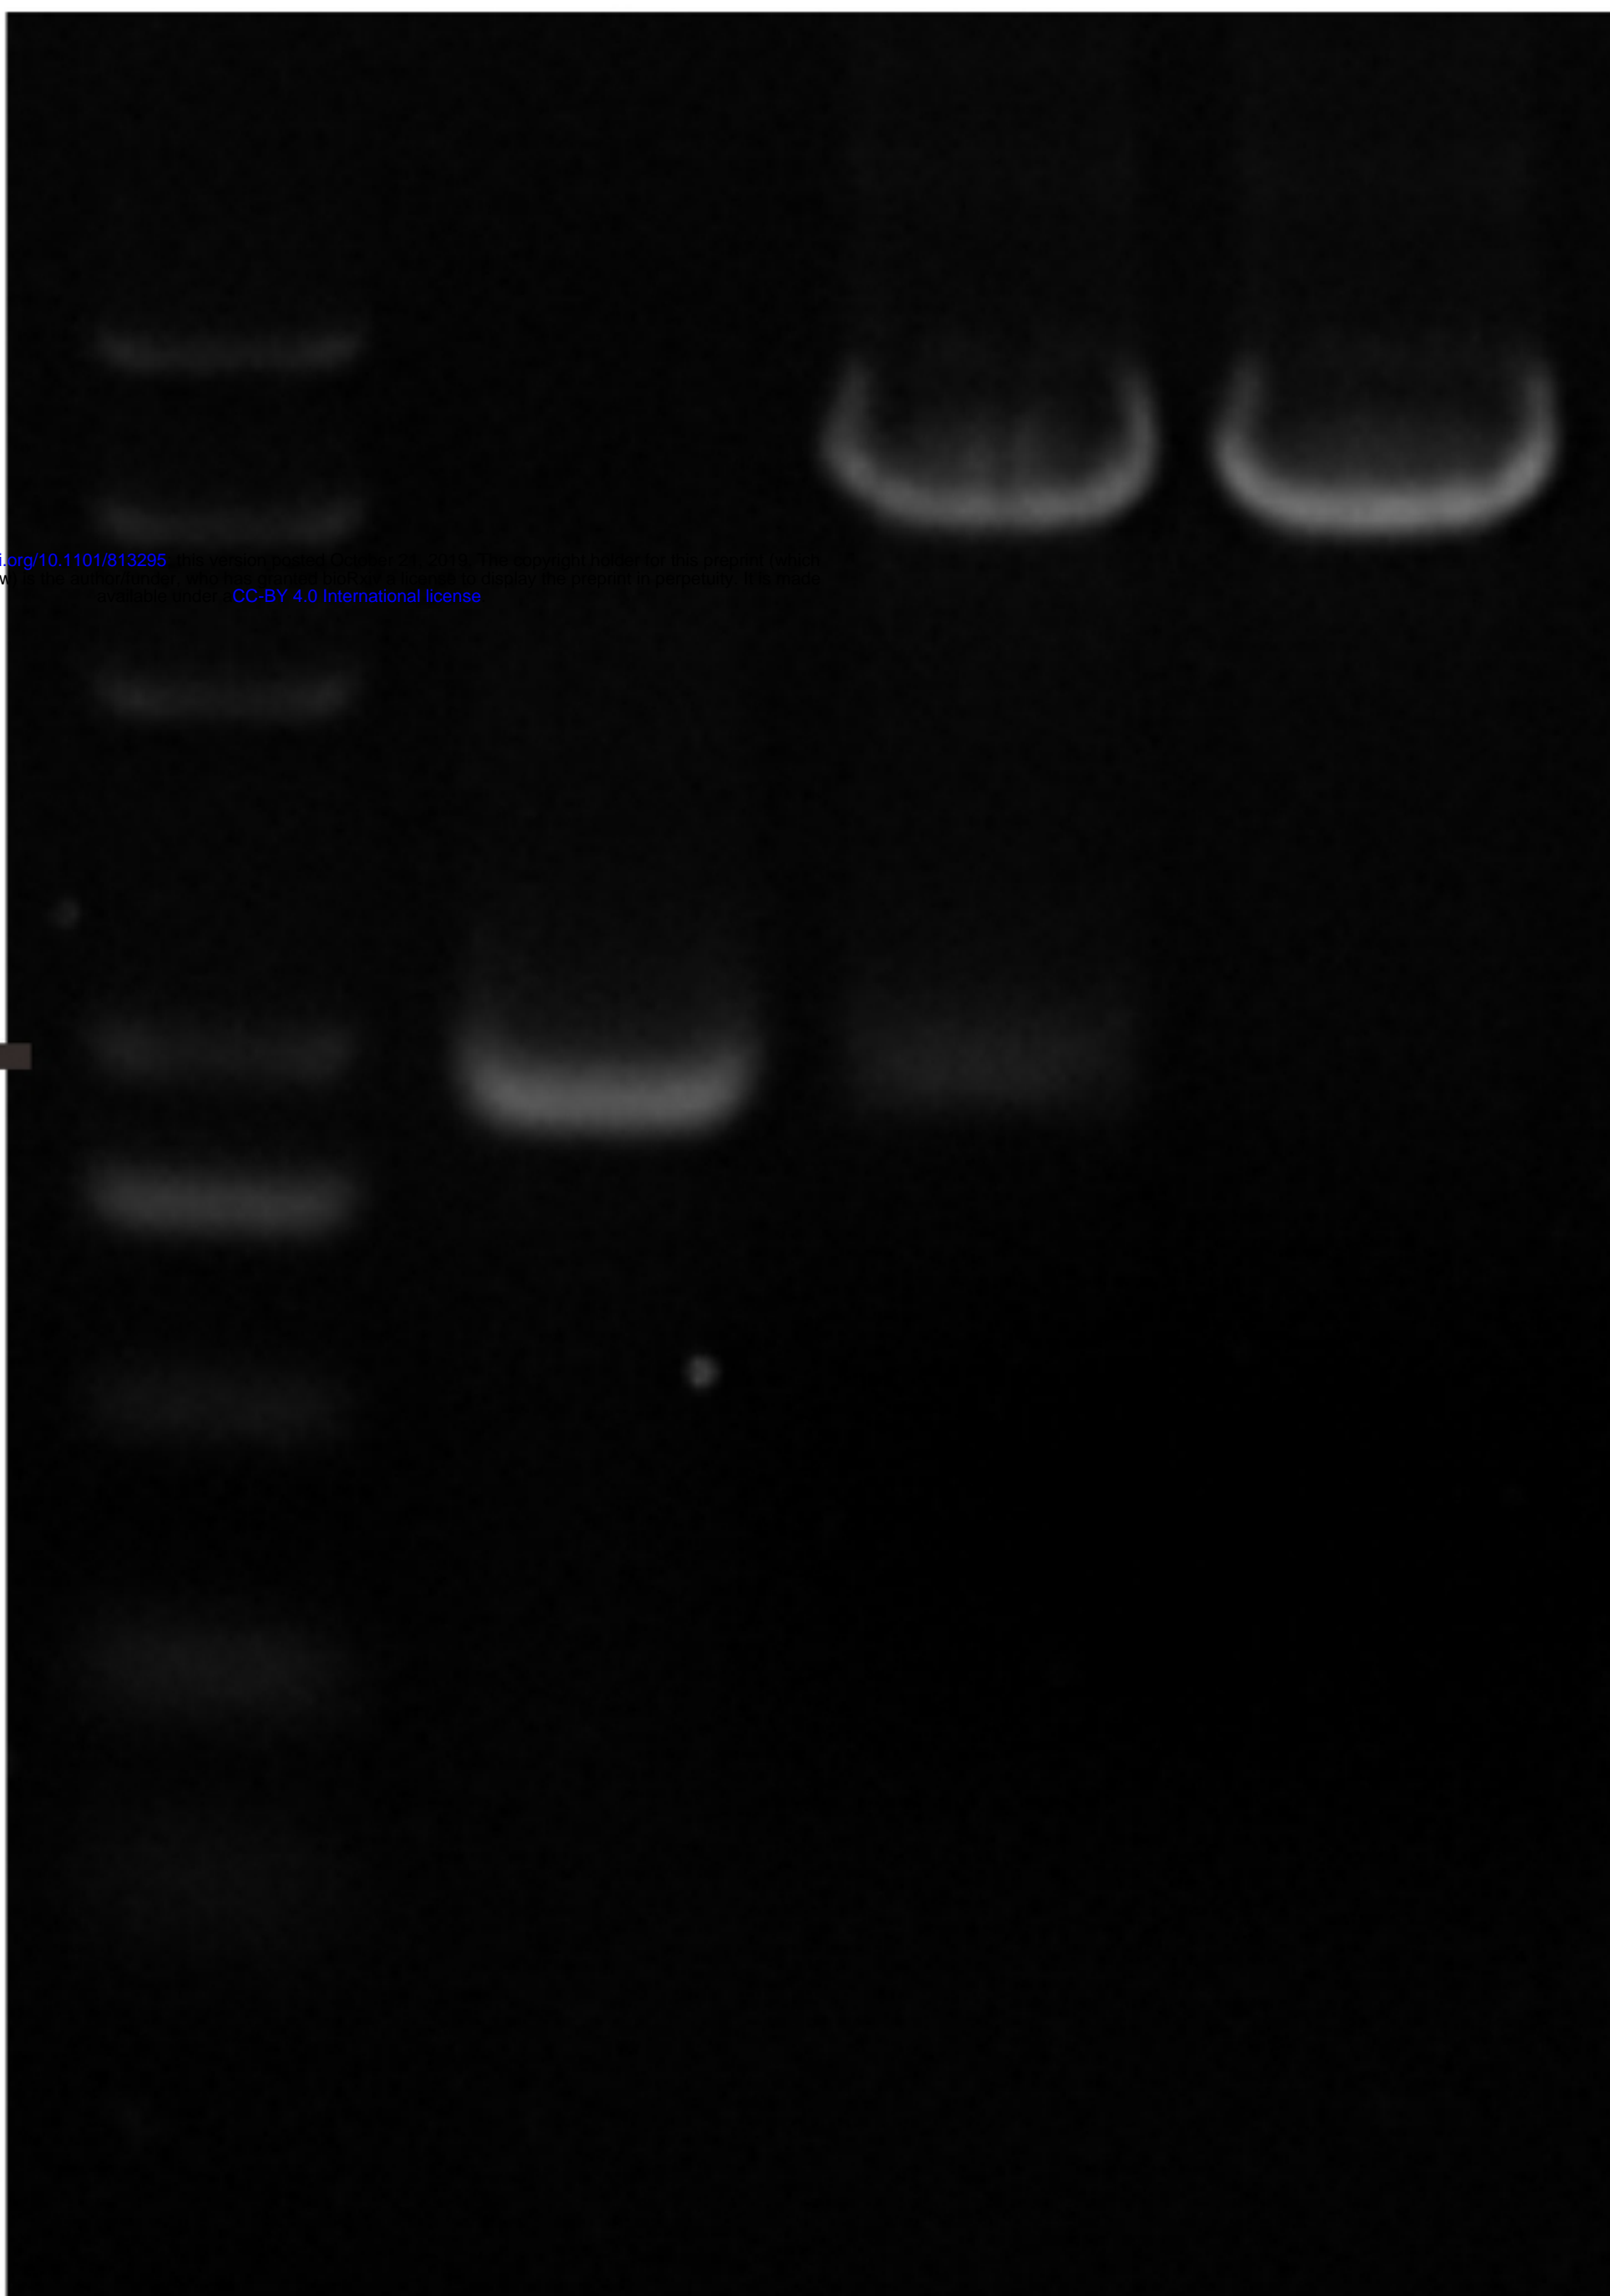

bioRxiv preprint doi: <https://doi.org/10.1101/813295>; this version posted October 20, 2019. The copyright holder for this preprint (which was not certified by peer review) is the author/funder, who has granted bioRxiv a license to display the preprint in perpetuity. It is made available under aCC-BY 4.0 International license.

figure

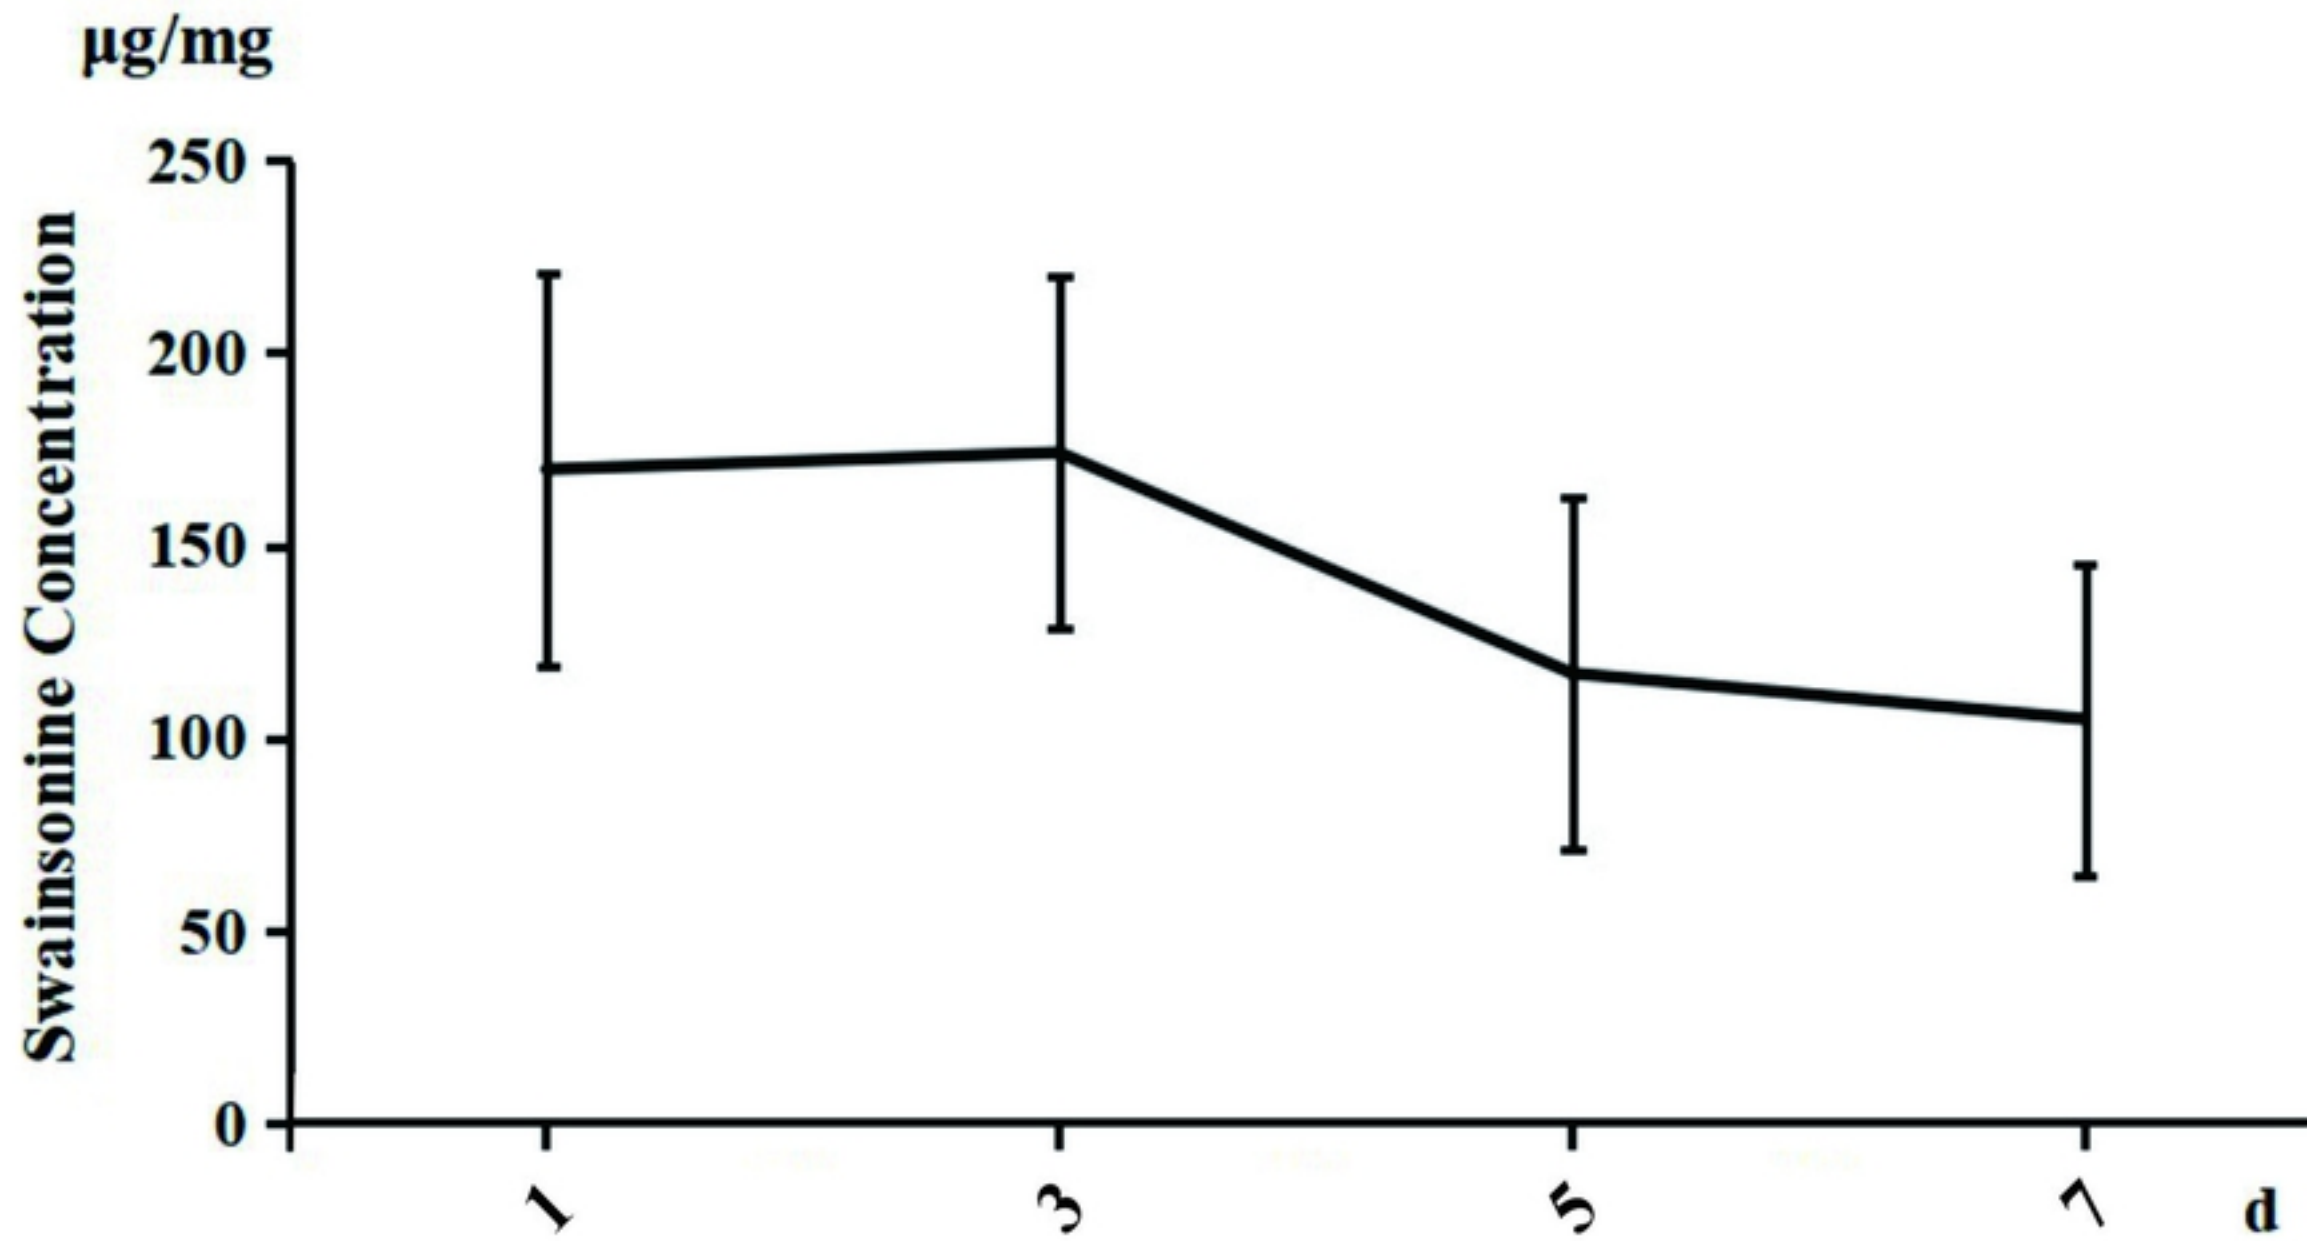

figure



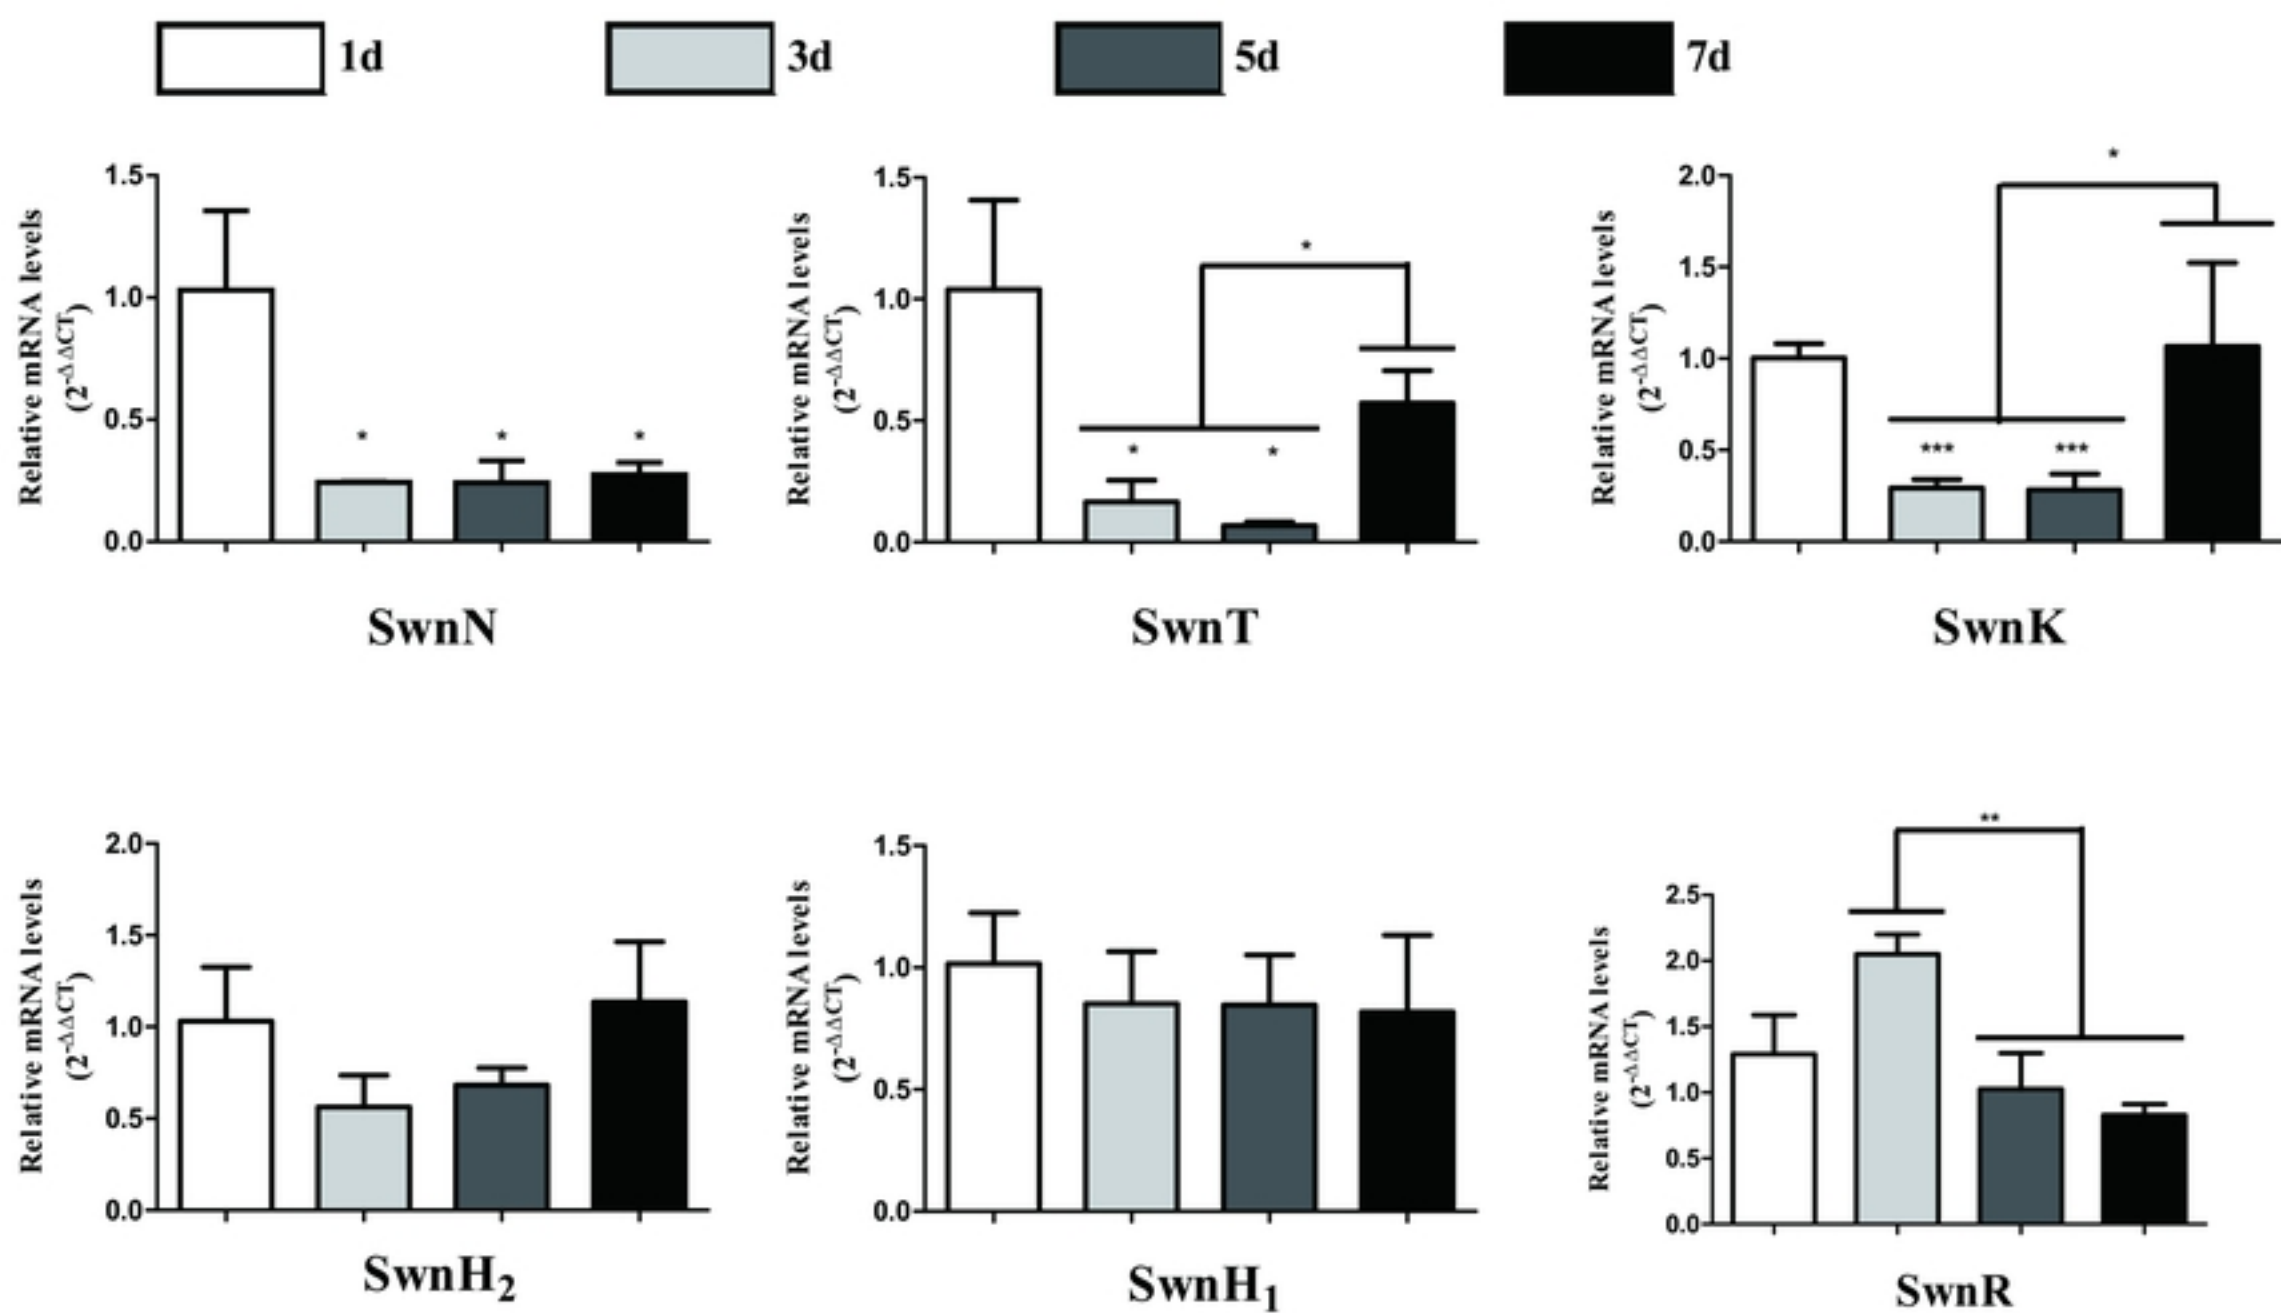

Figure

A

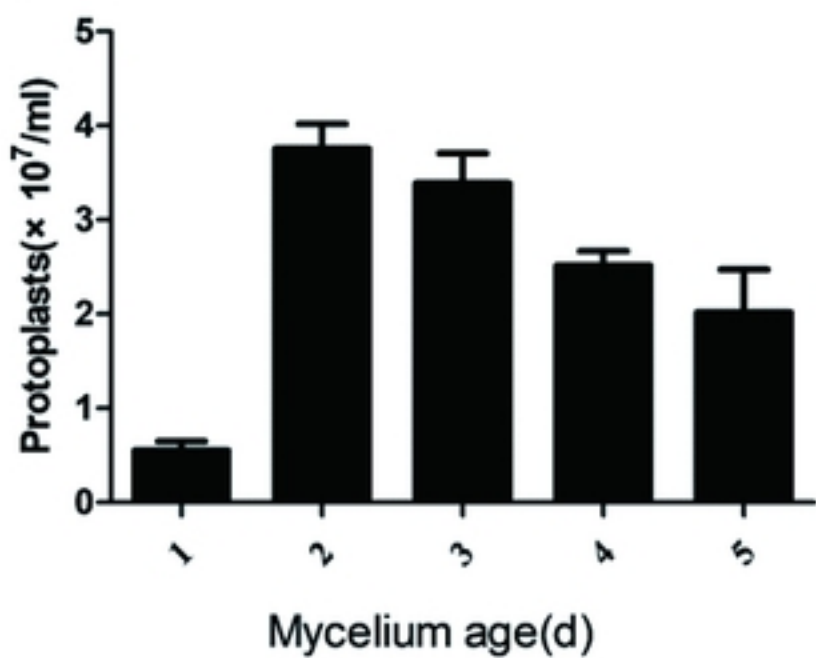

B

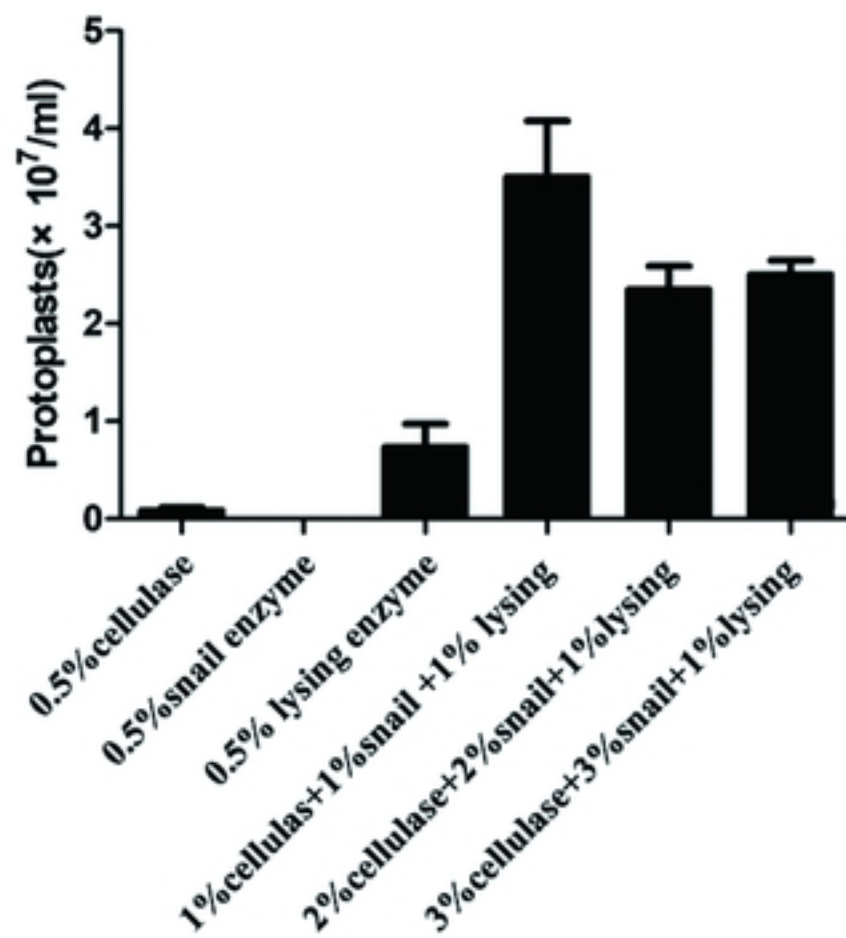

C

bioRxiv preprint doi: <https://doi.org/10.1101/813295>; this version posted October 21, 2019. The copyright holder for this preprint (which was not certified by peer review) is the author/funder, who has granted bioRxiv a license to display the preprint in perpetuity. It is made available under aCC-BY 4.0 International license.

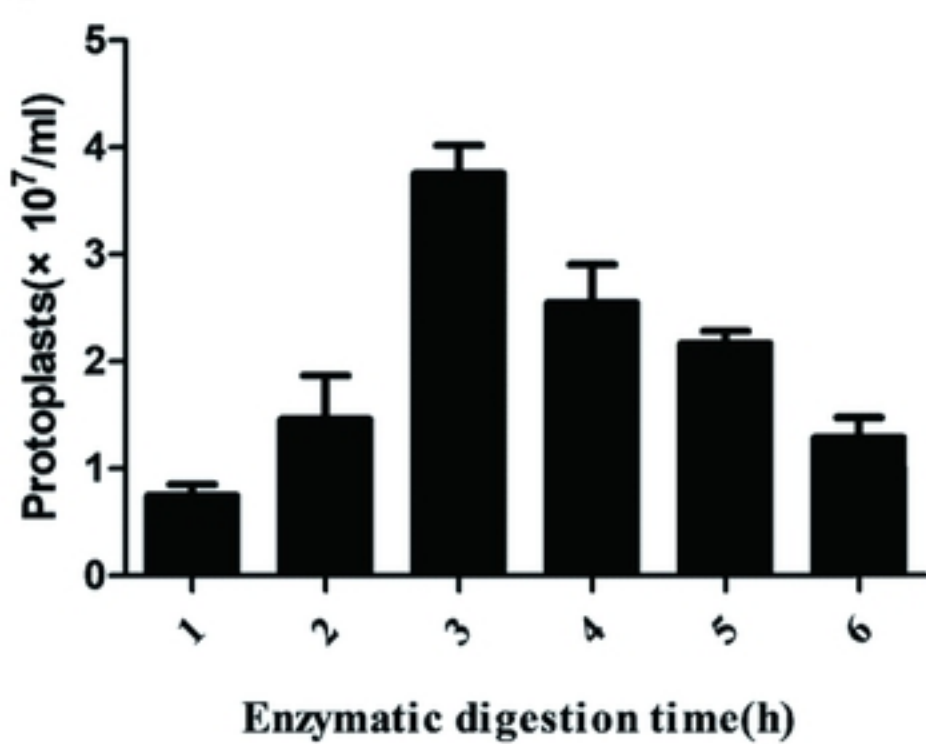

D

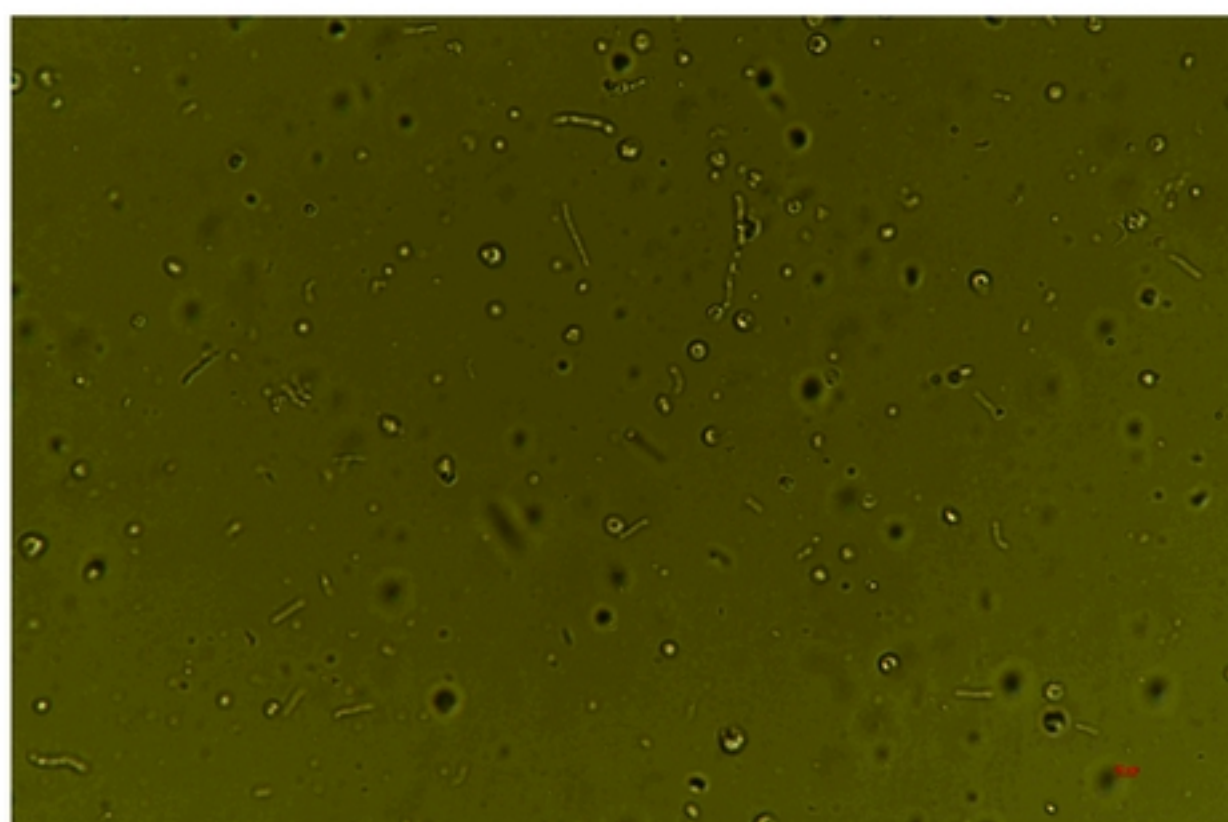

E

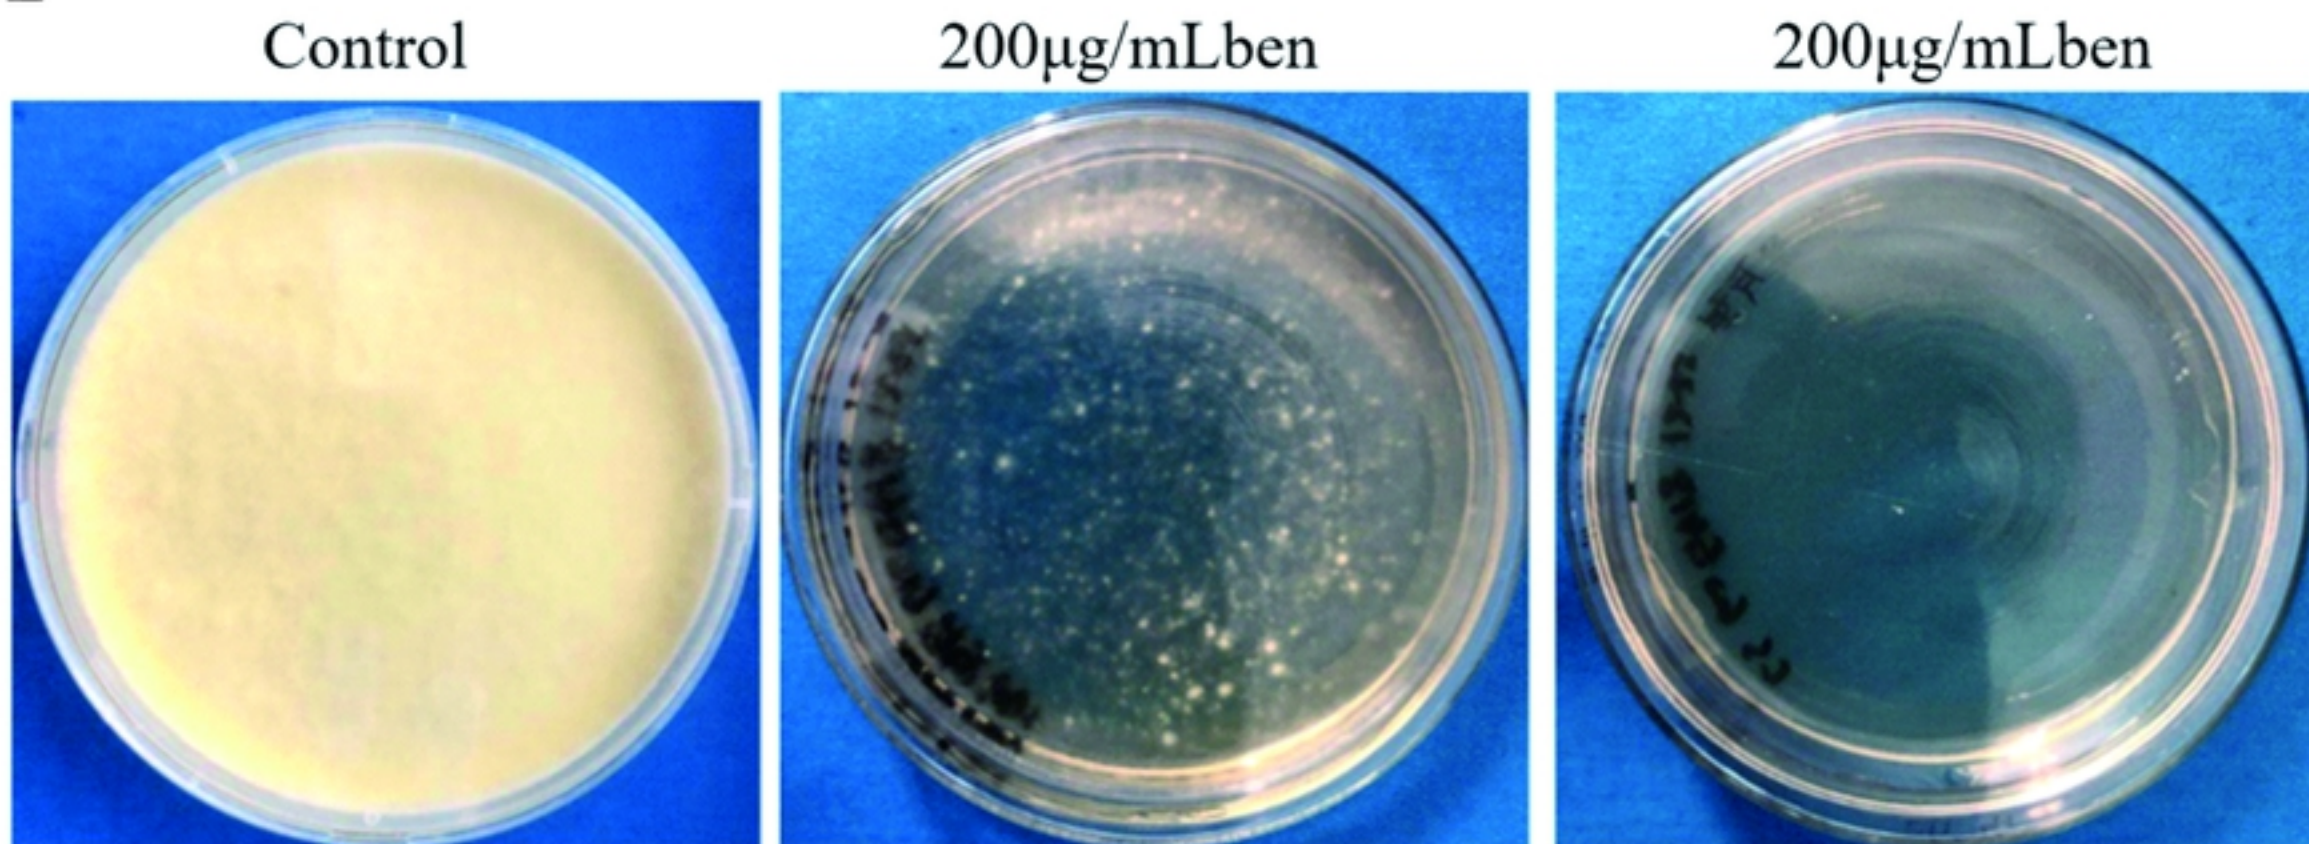

Figure

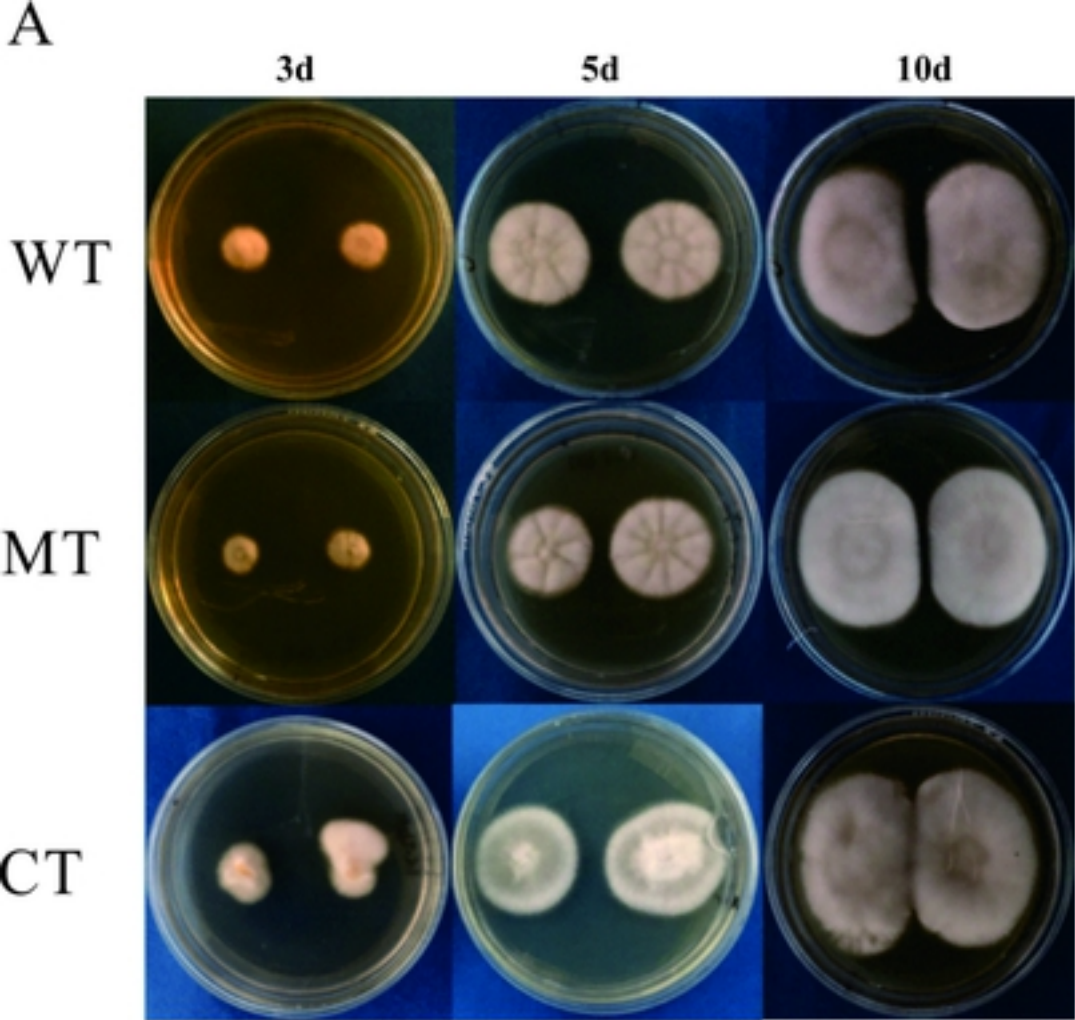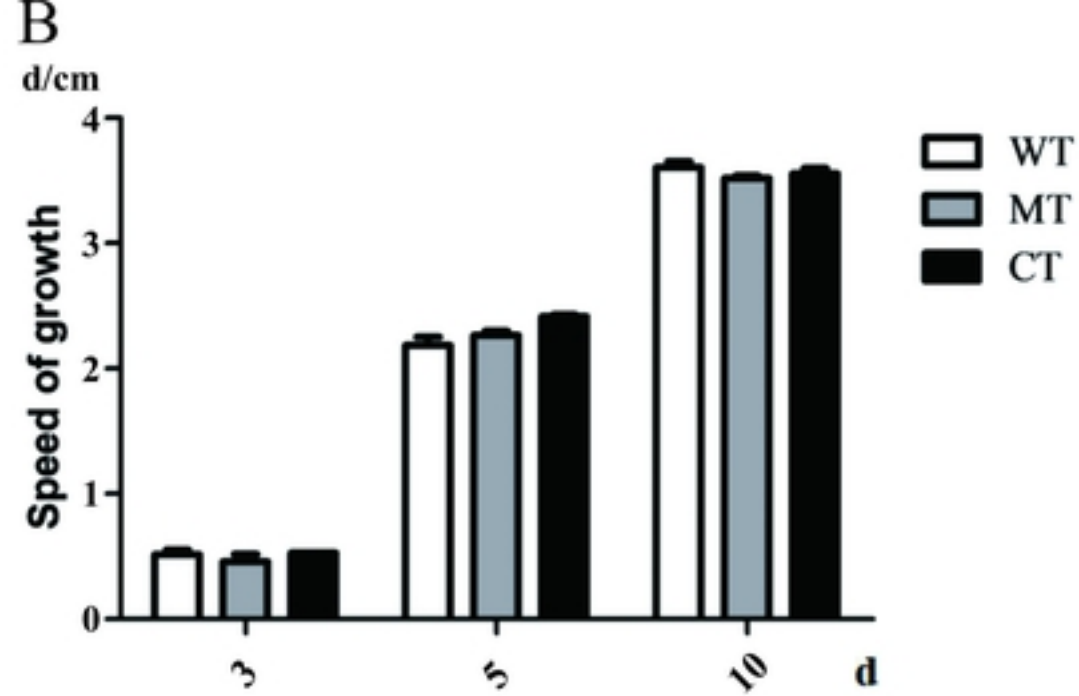

Figure

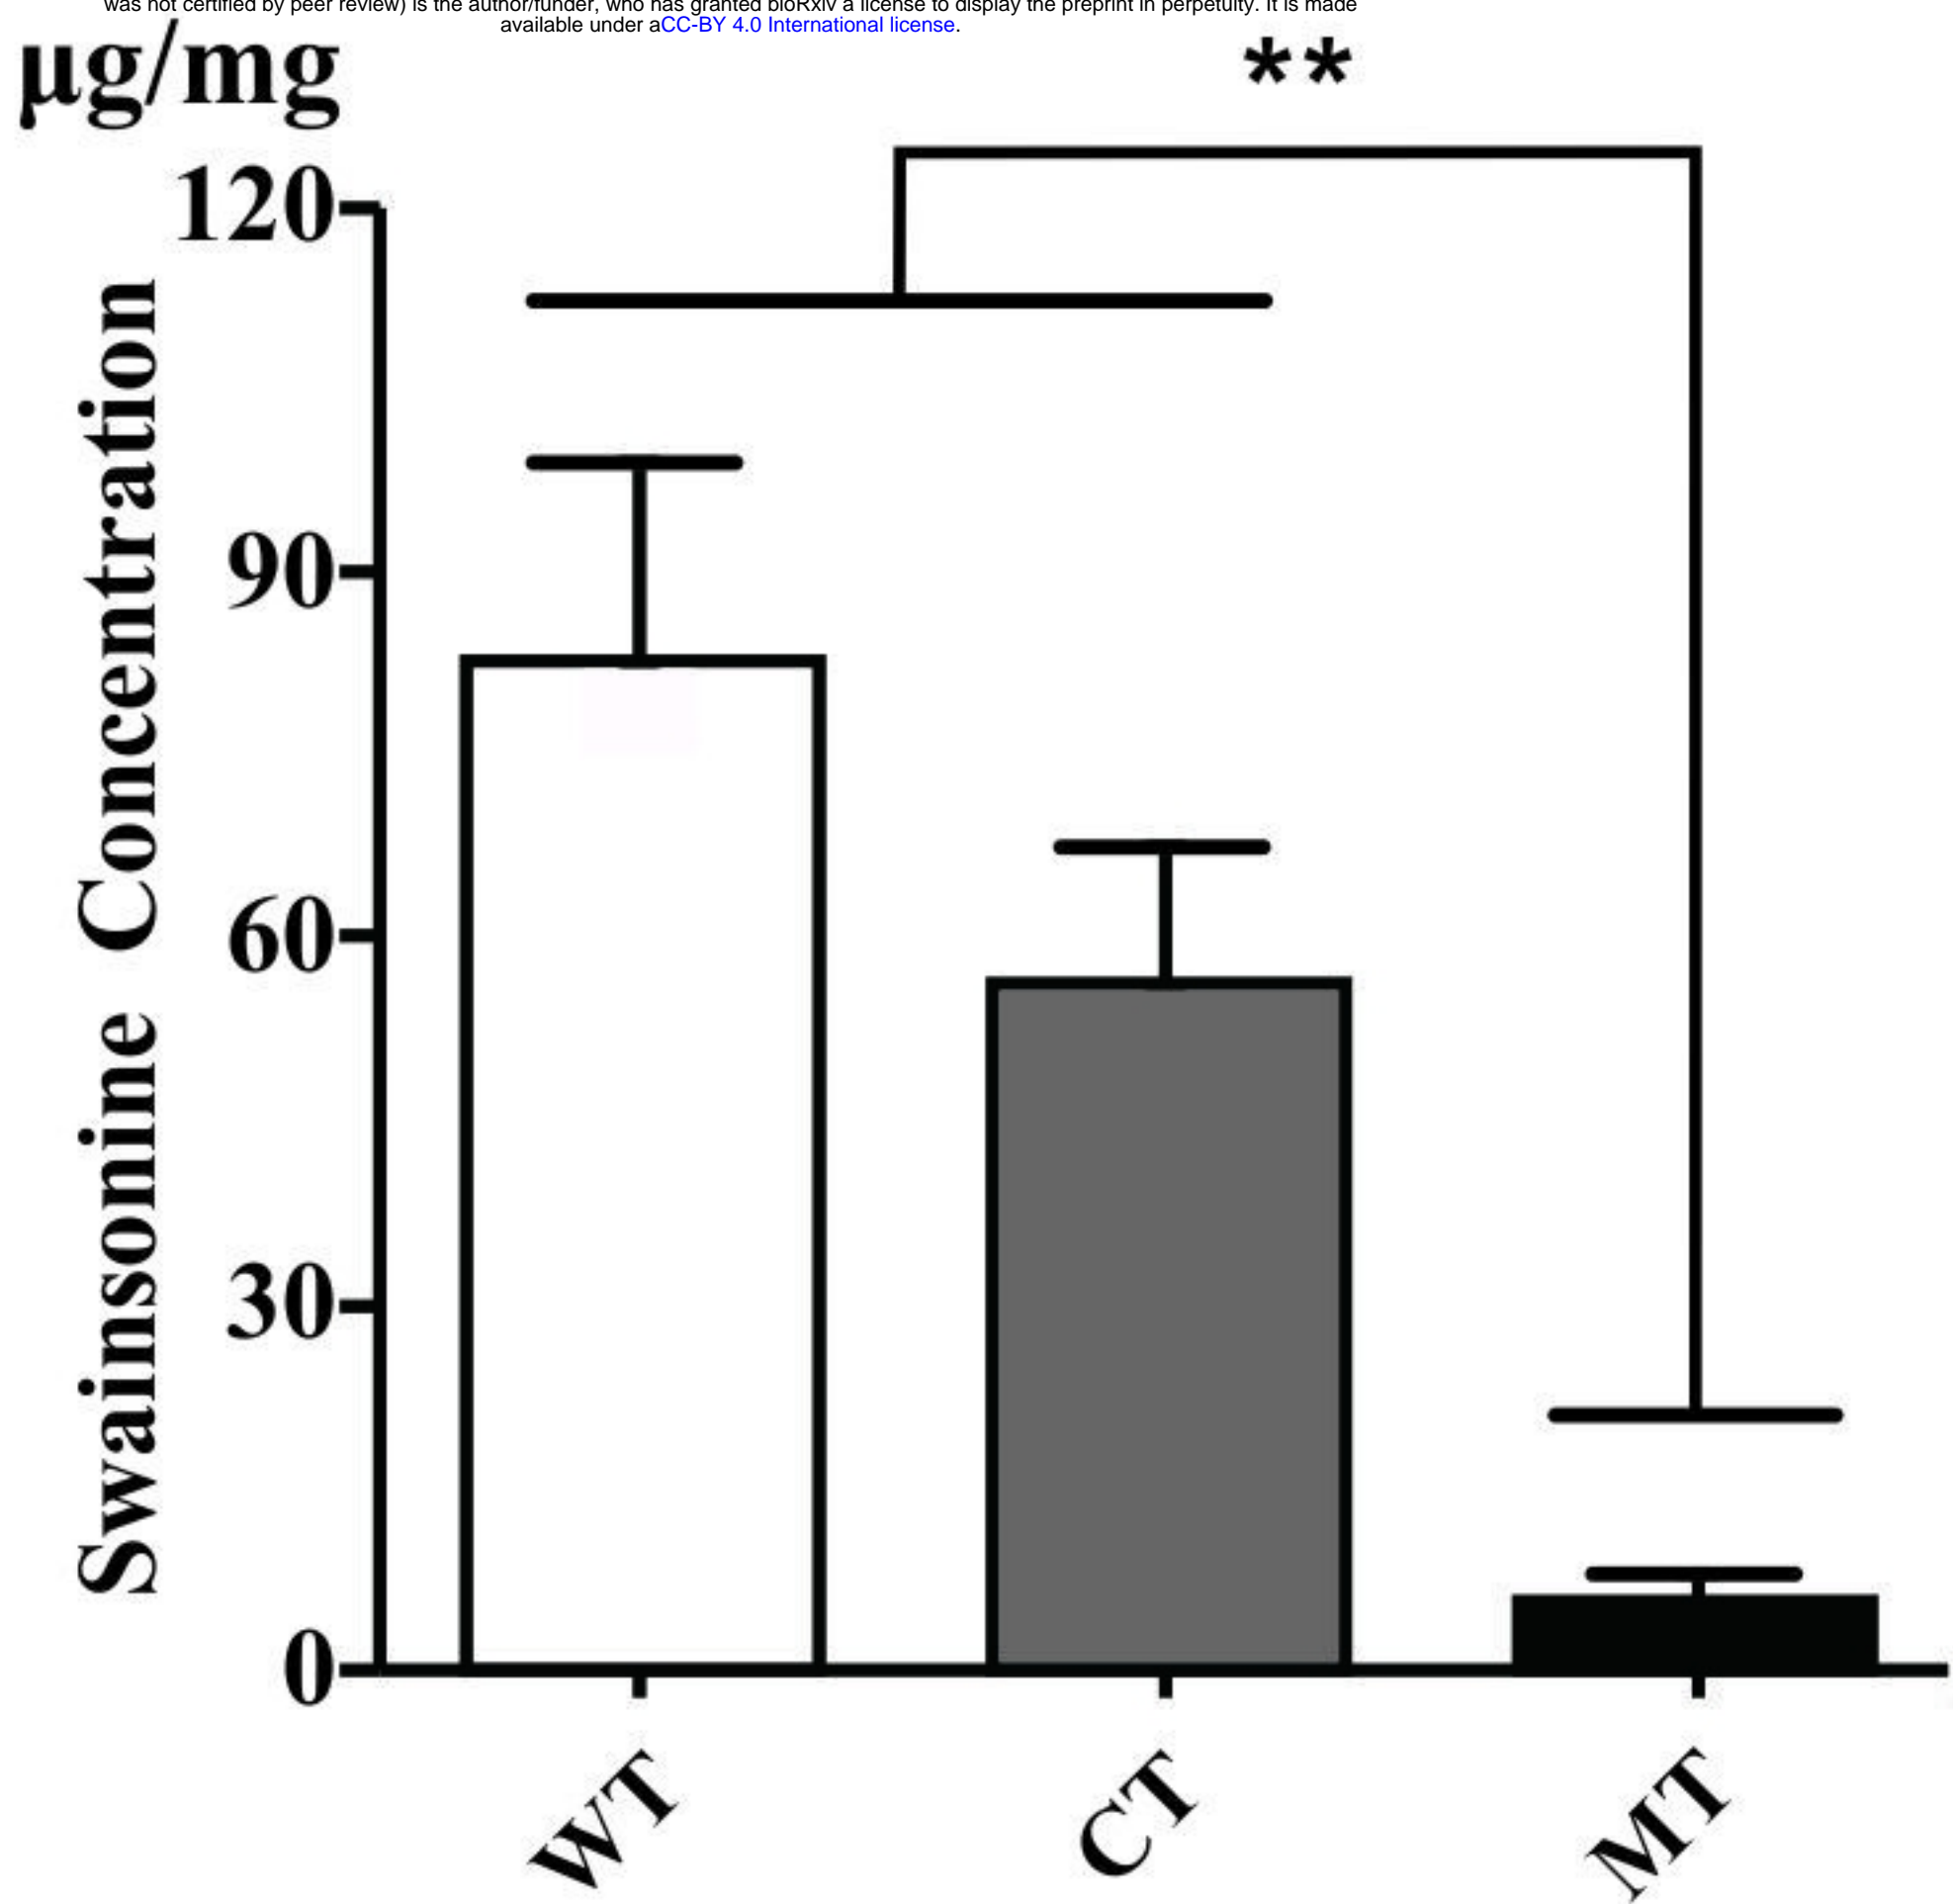

Figure

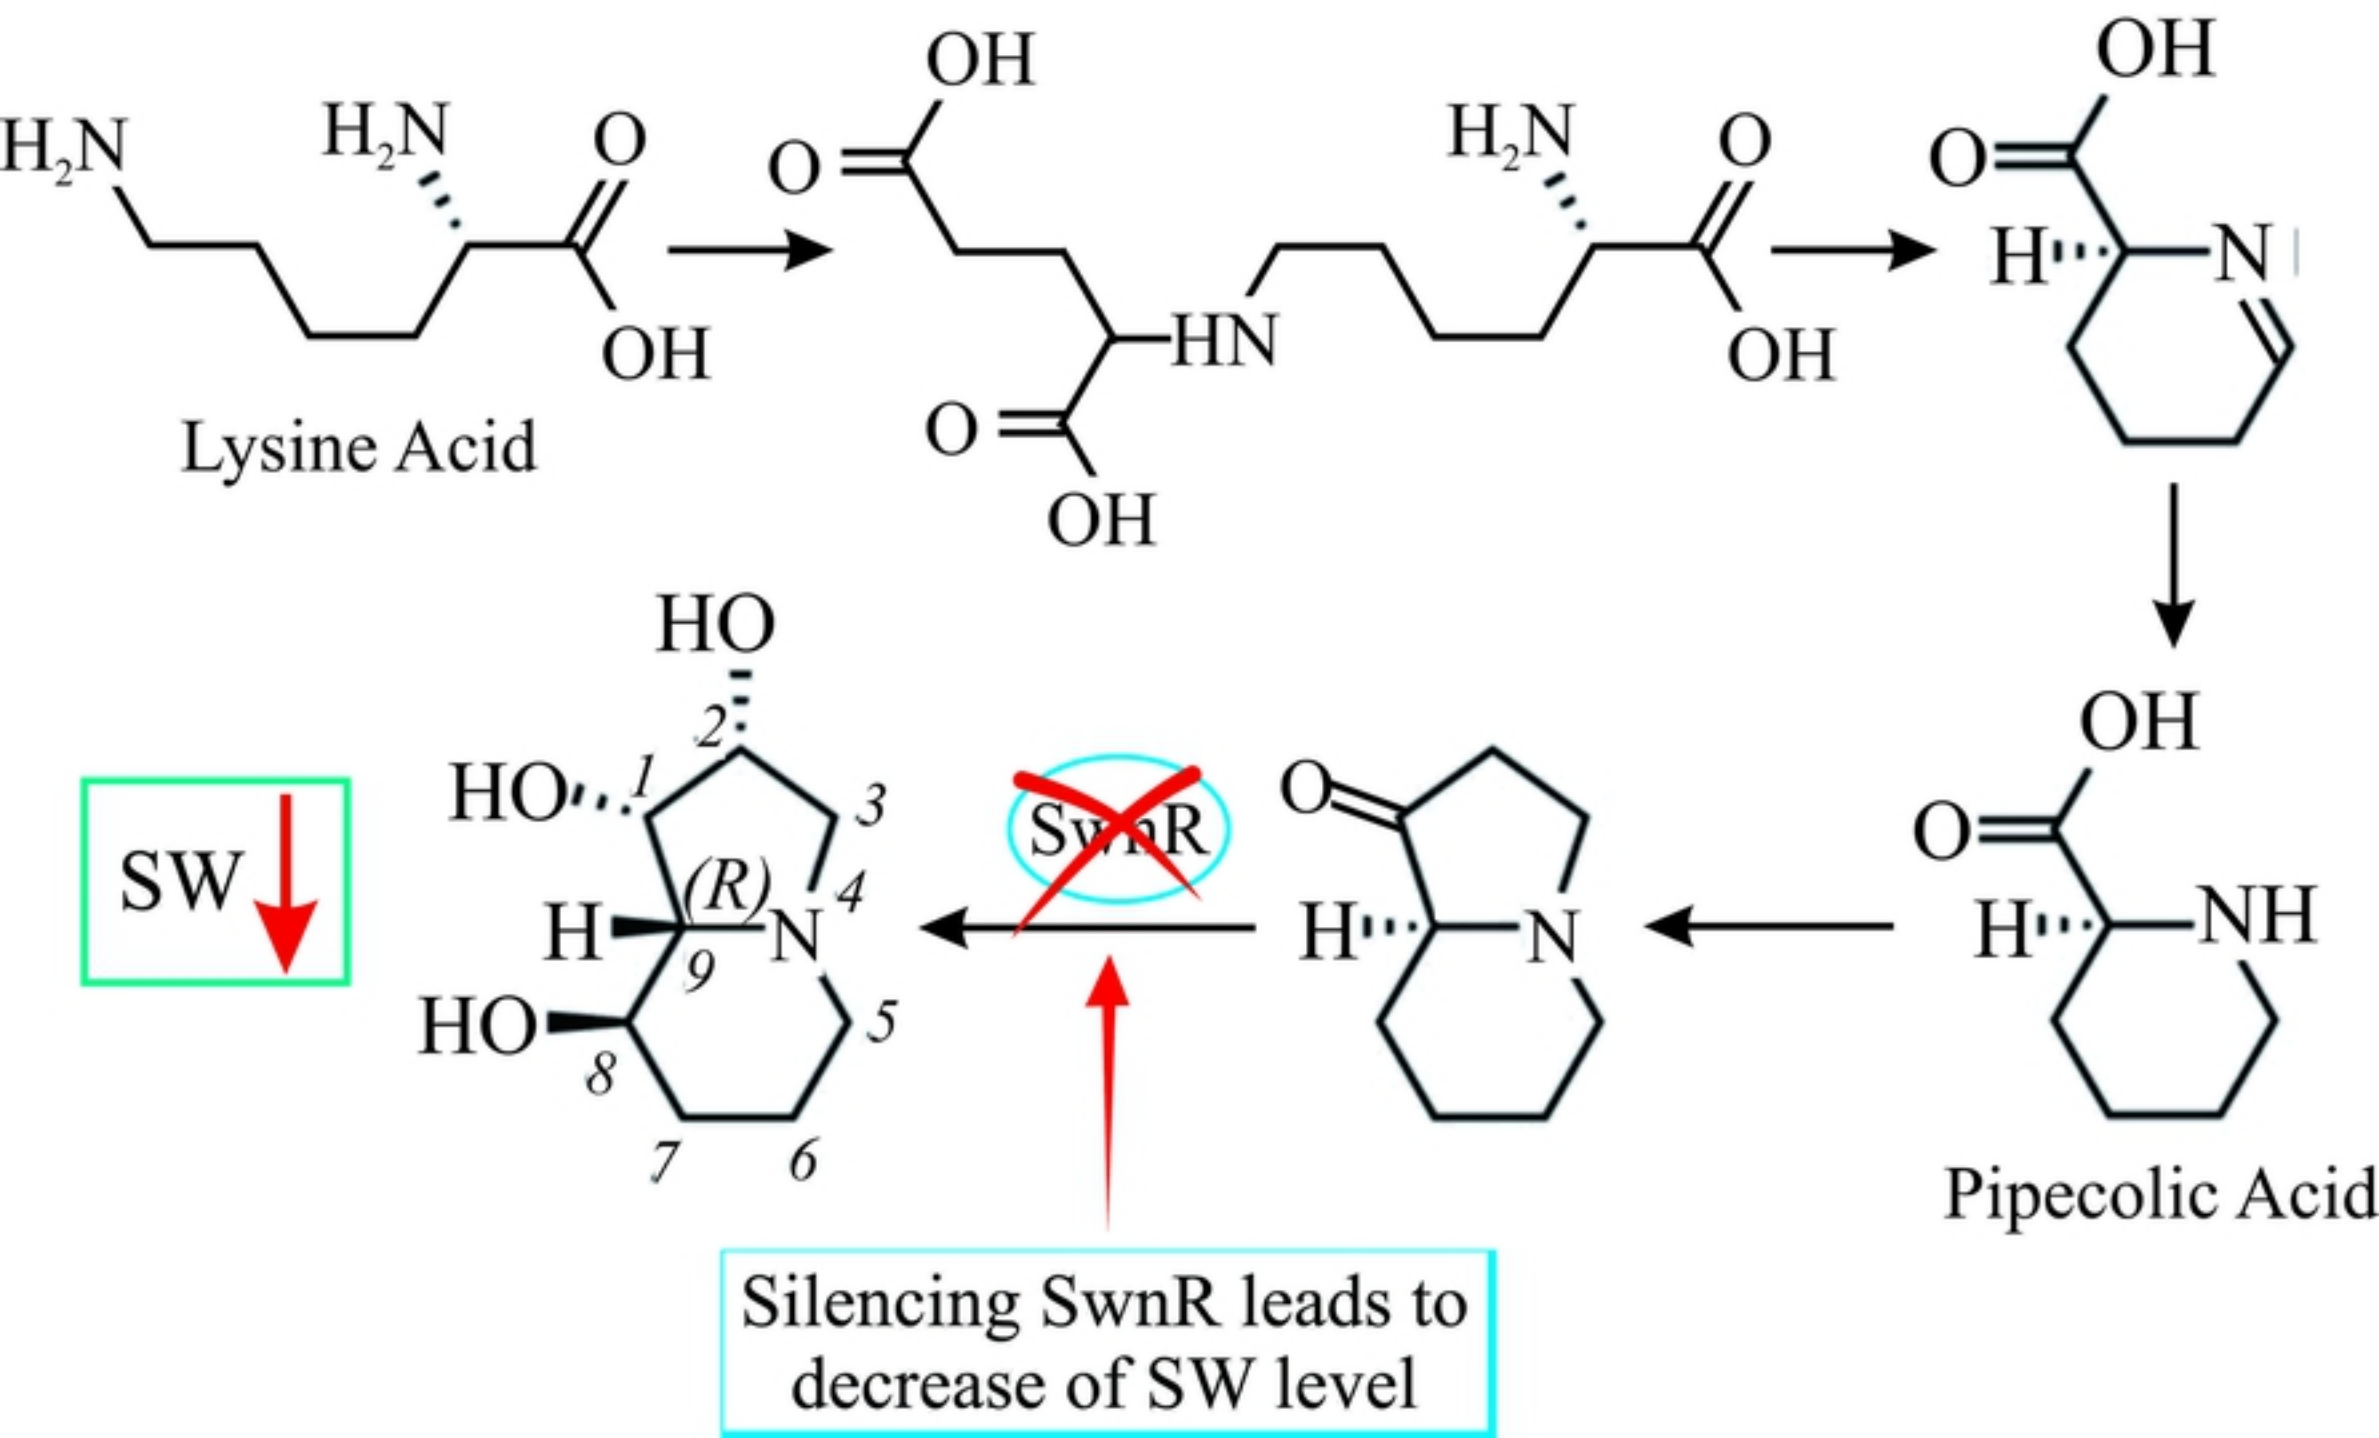

Figure
